# Supplementary material for: Women’s experiences of the renewed National Cervical Screening Program in Australia 12 months following implementation: a qualitative study
Source: PubMed Central journal article supplement — BMJ Open. 2020 Jul 13;10(7):e039041. doi: 10.1136/bmjopen-2020-039041 (PMC7359067; doi:10.1136/bmjopen-2020-039041), 2020-07-13
Supplement: bmjopen-2020-039041.draft_revisions.pdf [file bmjopen-2020-039041.draft_revisions.pdf]

# BMJ Open

BMJ Open is committed to open peer review. As part of this commitment we make the peer review history of every article we publish publicly available.

When an article is published we post the peer reviewers' comments and the authors' responses online. We also post the versions of the paper that were used during peer review. These are the versions that the peer review comments apply to.

The versions of the paper that follow are the versions that were submitted during the peer review process. They are not the versions of record or the final published versions. They should not be cited or distributed as the published version of this manuscript.

BMJ Open is an open access journal and the full, final, typeset and author-corrected version of record of the manuscript is available on our site with no access controls, subscription charges or pay-per-view fees (<http://bmjopen.bmj.com>).

If you have any questions on BMJ Open's open peer review process please email [info.bmjopen@bmj.com](mailto:info.bmjopen@bmj.com)

# BMJ Open

## Women's experiences of the renewed National Cervical Screening Program in Australia 12 months following implementation: a qualitative study

|                               |                                                                                                                                                                                                                                                                           |
|-------------------------------|---------------------------------------------------------------------------------------------------------------------------------------------------------------------------------------------------------------------------------------------------------------------------|
| Journal:                      | <i>BMJ Open</i>                                                                                                                                                                                                                                                           |
| Manuscript ID                 | bmjopen-2020-039041                                                                                                                                                                                                                                                       |
| Article Type:                 | Original research                                                                                                                                                                                                                                                         |
| Date Submitted by the Author: | 02-Apr-2020                                                                                                                                                                                                                                                               |
| Complete List of Authors:     | Dodd, Rachael; The University of Sydney, School of Public Health<br>Mac, Olivia; The University of Sydney, Sydney Health Literacy Lab,<br>School of Public Health<br>McCaffery, Kirsten; The University of Sydney, Sydney Health Literacy<br>Lab, School of Public Health |
| Keywords:                     | Community gynaecology < GYNAECOLOGY, QUALITATIVE RESEARCH,<br>PREVENTIVE MEDICINE, PUBLIC HEALTH                                                                                                                                                                          |
|                               |                                                                                                                                                                                                                                                                           |

SCHOLARONE™  
Manuscripts

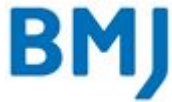

I, the Submitting Author has the right to grant and does grant on behalf of all authors of the Work (as defined in the below author licence), an exclusive licence and/or a non-exclusive licence for contributions from authors who are: i) UK Crown employees; ii) where BMJ has agreed a CC-BY licence shall apply, and/or iii) in accordance with the terms applicable for US Federal Government officers or employees acting as part of their official duties; on a worldwide, perpetual, irrevocable, royalty-free basis to BMJ Publishing Group Ltd ("BMJ") its licensees and where the relevant Journal is co-owned by BMJ to the co-owners of the Journal, to publish the Work in this journal and any other BMJ products and to exploit all rights, as set out in our [licence](#).

The Submitting Author accepts and understands that any supply made under these terms is made by BMJ to the Submitting Author unless you are acting as an employee on behalf of your employer or a postgraduate student of an affiliated institution which is paying any applicable article publishing charge ("APC") for Open Access articles. Where the Submitting Author wishes to make the Work available on an Open Access basis (and intends to pay the relevant APC), the terms of reuse of such Open Access shall be governed by a Creative Commons licence – details of these licences and which [Creative Commons](#) licence will apply to this Work are set out in our licence referred to above.

Other than as permitted in any relevant BMJ Author's Self Archiving Policies, I confirm this Work has not been accepted for publication elsewhere, is not being considered for publication elsewhere and does not duplicate material already published. I confirm all authors consent to publication of this Work and authorise the granting of this licence.

1  
2  
3  
4 **Women's experiences of the renewed National Cervical Screening Program in Australia**  
5  
6 **12 months following implementation: a qualitative study**  
7

8 Rachael H Dodd<sup>1</sup>, Olivia Mac<sup>1</sup>, Kirsten J McCaffery<sup>1</sup>  
9

10  
11 <sup>1</sup>The University of Sydney, Faculty of Medicine and Health, School of Public Health, NSW 2006,  
12  
13 Australia  
14

15  
16 Main text word count: 3461  
17

18 Abbreviations: HPV: human papillomavirus; NCSP: National Cervical Screening Program; GP:  
19  
20 General Practitioner  
21  
22

23 **Corresponding Author:** Rachael Dodd, The University of Sydney, Faculty of Medicine and  
24  
25 Health, School of Public Health, Room 127A, Edward Ford Building, Sydney, NSW 2006  
26

27  
28 T: +61 2 9351 5102; E: [Rachael.dodd@sydney.edu.au](mailto:Rachael.dodd@sydney.edu.au)  
29  
30  
31  
32  
33  
34  
35  
36  
37  
38  
39  
40  
41  
42  
43  
44  
45  
46  
47  
48  
49  
50  
51  
52  
53  
54  
55  
56  
57  
58  
59  
60

## ABSTRACT

Objective: To explore women's experiences of the renewed National Cervical Screening Program in Australia from the perspective of women who have received different HPV test results.

Design: Qualitative interview study.

Setting: Australia

Participants: Women in Australia aged 25-74 who reported participating in cervical screening since December 2017, purposively sampled by test result.

Methods: 26 interviews with women aged 25-74 were conducted and analysed thematically.

Results: Three main themes emerged: knowledge and attitudes about the program changes, information dissemination, the meaning and responses to test results and the new test. Some women showed little awareness of the changes, but others understood that HPV is detected earlier than abnormal cells. Some expressed positive attitudes towards the test and were not anxious about less frequent screening. Most women envisaged the changes would have minimal impact on their screening behaviour. Women mainly wanted more information about the changes and the possible results from the new test. Overall women could recall their HPV results and understand the implications for future cervical screening. Anxiety about being at 'increased risk' was more apparent in women who were HPV positive without history of abnormal results.

Conclusions: Women show some understanding of HPV and the new test, but more written and public communication about the changes and possible results are warranted. Efforts are needed to ensure women who are HPV positive without history of abnormal results receive the information needed to alleviate anxiety.

Funding: This work was supported by a NHMRC Program Grant (APP1113532).

1  
2  
3 Keywords: attitudes, cancer screening, [Cervical Intraepithelial Neoplasia](#), [Human Papillomavirus](#)

4  
5  
6 [DNA Tests](#), [Qualitative Research](#)  
7  
8  
9  
10  
11  
12  
13  
14  
15  
16  
17  
18  
19  
20  
21  
22  
23  
24  
25  
26  
27  
28  
29  
30  
31  
32  
33  
34  
35  
36  
37  
38  
39  
40  
41  
42  
43  
44  
45  
46  
47  
48  
49  
50  
51  
52  
53  
54  
55  
56  
57  
58  
59  
60

For peer review only

## ARTICLE SUMMARY

### Strengths and limitations of this study

- The qualitative design enabled us to explore in depth experiences of women residing in Australia who reported cervical screening since implementation of the renewed NCSP and their understanding of the results from the new cervical screening test.
- A major strength is the inclusion of women with a range of test results and provide insight into how much information women perceived they received about the new program and how they understood their test results.
- Due to the qualitative nature of the study, we cannot express the findings as generalisable across the whole population and the sample was restricted to women who could speak English.

## INTRODUCTION

As cervical cancer prevention strategies such as the human papillomavirus (HPV) vaccination and cervical screening are increasingly successful in reducing HPV infections<sup>1</sup> and cervical abnormalities,<sup>2</sup> countries worldwide are looking to switch from primary cytology-based cervical screening to primary HPV-based screening.<sup>3-5</sup> Australia was one of the first high-income countries to implement primary HPV-based screening in the Renewal of the Australian National Cervical Screening Program (NCSP) in December 2017, where women aged 25-74 are now screened every five years with primary HPV-based screening.<sup>6</sup>

Primary HPV-based screening changes the screening results women receive. In addition to being told their HPV test result (HPV positive/HPV negative), women will also receive information about their risk of a significant cervical abnormality, determined by the subtype of HPV they have (HPV 16/18 or HPV not 16/18 subtype). Women who are HPV negative (HPV-) will be told they are at low risk and are recommended to rescreen in five years' time (Figure 1). Women who are HPV positive (HPV+) will also have a cytology test. HPV+ women, non 16/18 subtype, who have normal cytology or low-grade abnormalities will be informed they are at intermediate risk and will be recommended to rescreen in 12 months' time. Women with any HPV+ result who have abnormal cytology will be informed that they are at higher risk and will be referred for a colposcopy.<sup>7</sup>

>Figure 1 here<

Previous research has demonstrated a number of negative psychosocial impacts for women testing HPV+ including anxiety and distress,<sup>8,9</sup> feelings of stigma, embarrassment and confusion, as well as concerns about their sexual relationships in terms of trust, fidelity and blame due to concern about the sexually transmitted nature of HPV.<sup>10</sup> Findings from our previous study which surveyed over 1000 women in Australia, also showed women who tested



1  
2  
3 HPV+ were more anxious and distressed than those who tested HPV-,<sup>11</sup> with anxiety scores 10  
4 points higher than those found in a recent English study.<sup>12</sup>  
5  
6

7  
8 As most research to date has been quantitative and conducted prior to implementing the NCSP  
9 changes, there is a need for in-depth qualitative exploration of women's views and experiences  
10 of the renewed NCSP in the year since its implementation. Qualitative findings can explore  
11 women's first-hand experience of the new program, and their response to the new test results  
12 along with their understanding of what these results mean for them, which may be useful for  
13 other countries implementing primary HPV-based screening. This study aimed to explore in-  
14 depth women's experiences of the renewed cervical screening program, from the perspective of  
15 women who have received different test results.  
16  
17  
18  
19  
20  
21  
22  
23

## 24 25 **MATERIALS AND METHODS**

### 26 27 **Participants and recruitment**

28  
29  
30 Participants were women residing in Australia who had received cervical screening since the  
31 renewal of the NCSP (December 2017). Participants were recruited through a market research  
32 company, Dynata during December 2018. Dynata have a database panel of 600,000 members  
33 in Australia to approach participants who meet the eligibility criteria. Participants listed on their  
34 database have already indicated a willingness to participate in online research. Women were  
35 directed to complete an online questionnaire eliciting demographic and cervical screening  
36 information as well as psychosocial measures. At the end of the survey, women were asked if  
37 they would like to participate in a follow up interview and if yes, asked to leave their contact  
38 details so the research team could contact them.  
39  
40  
41  
42  
43  
44  
45  
46  
47  
48

49  
50 Participants received points from Dynata which can be redeemed for items such as gift  
51 vouchers, donations to charities or cash. Participants first received points that represented  
52  
53  
54  
55  
56  
57

1  
2  
3 modest compensation for the time spent completing the survey, with further points on  
4 completion of an interview.  
5  
6

7  
8 Participants were purposively sampled from 449 women agreeing to be contacted for interview,  
9  
10 to include women from a range of age groups, education and test results (HPV+ 16/18, HPV+  
11 other, HPV-, HPV unknown; Table 1). Of these 449 women, 33 were HPV+, 374 HPV- and 42  
12 didn't know or couldn't remember their result. Data collection ceased when no new themes were  
13  
14 emerging from the data and therefore saturation was reached.<sup>13</sup>  
15  
16

17  
18  
19 >Table 1 here<  
20  
21

## 22 **Procedure**

23  
24 Semi-structured interviews, using a purpose-designed interview guide informed by a review of  
25 previous literature on women's attitudes towards to changes to cervical screening programs,  
26 both in Australia<sup>14-16</sup> and overseas,<sup>17,18</sup> were conducted during December 2018.  
27  
28  
29

30  
31 The topic guide covered questions regarding attitudes, understanding and confidence, expected  
32 impact, understanding of results, any psychosocial impacts and helpful educational and other  
33 support resources, in relation to the NCSP changes (See supplementary information).  
34  
35  
36

37  
38 Interviews took place over the telephone and lasted between 10 and 27 minutes. Interviews  
39 were audio-recorded and professionally transcribed.  
40  
41

## 42 **Patient and public involvement**

43  
44  
45 Patients and the public were not directly involved in the design or planning of the study.  
46  
47

## 48 **Analysis**

49  
50 Interviews were analysed using Framework Analysis, an approach well suited to this type of  
51 research due to the organisation of data into a thematic framework which then enables views  
52 and experiences to be grouped together and comparisons made across participants.  
53  
54  
55  
56  
57

1  
2  
3 Both RD and OM familiarised themselves with the transcripts by reading over all the transcripts  
4 and making notes of recurring themes. RD developed the initial framework using the qualitative  
5 package NVivo 11.<sup>19</sup> The framework was amended through discussions between RD and OM  
6 and refined with input from KM. Using NVivo 11, data were summarised and organised into a  
7 matrix where each column represented a subtheme and each row a participant. Any  
8 disagreements in interpretation were resolved by discussion. The research team members work  
9 in the field of public health, with a special interest in reducing overdiagnosis and overtreatment.  
10  
11  
12  
13  
14  
15  
16  
17

## 18 **RESULTS**

19  
20  
21 We interviewed 26 women with sample characteristics shown in Table 2. Most women in the  
22 sample described being regular screeners (every two years). Some women in the sample had  
23 experienced abnormalities or a diagnosis of HPV previously and so had been monitored more  
24 closely than every two years under the old program.  
25  
26  
27  
28

29  
30 >Table 2 here<  
31

32  
33 Three main themes emerged from the data: knowledge and attitudes about the changes,  
34 information dissemination, and focus on meaning of results and the new test.  
35  
36

### 37 **1) Knowledge and attitudes about changes**

38  
39  
40 Despite being screened under the renewed program, some women demonstrated a lack of  
41 awareness of the changes to the cervical screening program [Q1; Table 3]. Women who were  
42 knowledgeable about the changes tended to be high information seekers and had done their  
43 own research [Q2].  
44  
45  
46  
47

48  
49 >Table 3 here<  
50

51  
52 Those who were aware regarded the main change to be the extended screening interval, from  
53 two year to five years, with a few women understanding that this was due to the change in  
54 screening technology [Q3]. Some women understood that what is being tested for has changed,  
55  
56  
57

1  
2  
3 with the effectiveness of screening for HPV rather than abnormal cells, noting this was earlier  
4 detection [Q4]. Overall women noted that the testing procedure was identical to the Pap smear  
5 [Q5].  
6  
7  
8

9  
10 A concern expressed about the extended screening interval was that cancer might develop and  
11 be missed in between screens, particularly prominent in women with personal experience of  
12 abnormalities [Q6]. A few HPV- women described the need to take responsibility for their own  
13 health due to the increased screening interval, which included getting any symptoms which  
14 were 'unusual' checked out at the doctor. However, women also expressed positive attitudes  
15 including experiencing less anxiety, stress and discomfort due to screening less often. Those  
16 women with positive views tended to contextualise these in terms of the new testing technology  
17 being more sensitive and more accurate [Q7] and this woman explained how she thought the  
18 testing process was much easier if you test HPV+ than previously with the Pap smear due to  
19 the ability to test the same sample [Q8].  
20  
21  
22  
23  
24  
25  
26  
27  
28  
29  
30

31 One woman alluded to the potential for overtreatment if screening with this new testing  
32 technology continued on a two-yearly basis, due to the high incidence of HPV and subsequent  
33 referrals for colposcopy [Q9].  
34  
35  
36  
37

38 Some women also related the program changes back to the HPV vaccination, recognising that  
39 uptake of the HPV vaccination should impact rates of HPV and therefore cervical cancer. This  
40 helped them make sense of the program changes and believed it could also help increase  
41 uptake of the HPV vaccination [Q10].  
42  
43  
44  
45  
46

47 For most women, they envisaged that the NCSP changes would have minimal impact on their  
48 screening behaviour. The only tangible impact the NCSP changes would have on their  
49 screening behaviour would be having to screen less often.  
50  
51  
52  
53

## 54 **2) Information dissemination**

55  
56  
57

## 2.1 Changes to the program

The amount of information women described being given about the changes to the cervical screening program when they attended for screening varied, with women mostly being told about it being a new test and that the screening interval would now be every five years. Some women were made aware of the changes through discussions with their GP/other health professionals; usually these discussions took place in the consultation, when they attended for screening. Most women said that the explanation was brief, but were asked if they had any questions about the changes [Q11]. A few women who attended for their Pap smear prior to December 2017, had been advised by their GP to postpone their screen to December 2017, as then they would then enter into the new program [Q12].

While some women were happy with the amount of information they received and had good experiences [Q13], others described less positive experiences with health professionals when it came to cervical screening, with one woman explaining that she had to go back multiple times as the doctor did not believe she needed to be screened [Q14].

Very few women reported being provided with written information by their GP or other health professional. Women spoke about the need for advertisements on television and in the media to encourage them to go for screening. Radio and internet advertisements were viewed as more likely to reach younger women [Q15].

Women felt information resources such as a pamphlet containing information about HPV and how common it is, would be useful to refer to as well as communicating it as being 'normal'. Additionally, information on self-care in terms of what to do if something is wrong or what potential symptoms could be, was also perceived as important. Being signposted to a website with information about the changes to the screening program and the meaning of results, was also suggested.

## 2.2 New results

When asked if there was anything that would have helped to better understand screening under the revised program, most women suggested a “staggering of information” over time, where they would receive information about the changes/possible results prior to screening and then again when receiving the results. Women who tested HPV+ in particular wanted to know about the possible results/referral information prior to screening; women who tested HPV- were more indifferent about receiving information about possible results prior to screening. Information about what the results meant was the main focus of seeking information for these women.

Women acknowledged that too much information can be overwhelming and lead to increased anxiety. Women felt information could accompany the invitation letter or be displayed in waiting rooms, with the combination of a brochure and conversation with a health professional being optimal [Q16].

The key time points identified for information delivery were: i) prior to screening, when invited; ii) during screening; iii) when receiving screening results. Information formats suggested by women included information pamphlets in GP offices, web-links to reputable online sources; and posters in shopping centres/public toilets.

### **3) Meaning of test results and emotional responses to the new test**

Women received their screening results in various ways including by letter, over the phone, face-to-face during a GP appointment, or not hearing anything and assuming everything was ok [Q17]. A few women described their anxiety in the time between the test and the results, with one woman expressing this was the first time she'd had the test and so didn't know what to expect [Q18].

Overall women were able to recall their HPV results (positive or negative) and understand the implications these HPV results have for returning for screening in the future. Even among the

1  
2  
3 women who did not know their results, they knew when they were due to have screening again.  
4  
5 However, these women did not demonstrate knowledge about the nature of HPV, its  
6  
7 transmission, and the implications of testing positive (or negative) for HPV and the associated  
8  
9 risk of progression to cervical cancer. Some women who were HPV+ did express knowledge  
10  
11 that their HPV result did not mean that cancer is inevitable and that these abnormal cells can  
12  
13 resolve by themselves without the need for treatment [Q19].  
14  
15

16 Higher risk women who had previously had an abnormal Pap smear result and/or already knew  
17  
18 their HPV+ status (especially types 16/18) due to persistent infection, were less alarmed about  
19  
20 receiving an HPV+ result. Similarly, women who had previously had a normal Pap smear result  
21  
22 and received an HPV- result were also not alarmed by this new type of result. However, women  
23  
24 who had previously had normal Pap smear results were somewhat anxious if they received  
25  
26 HPV+ results [Q20]. One woman who tested HPV- but had a previous abnormality would have  
27  
28 liked to be tested more frequently [Q21]. Those women who received an HPV+ result would  
29  
30 have liked their GP/other health professional to have explained the possible results of this test  
31  
32 prior to screening, as a means of preparing them [Q22].  
33  
34

35  
36 One of the HPV+ women described how initially she was worried about waiting 12 months after  
37  
38 being told she screened positive for HPV, but a better understanding reduced her worry [Q23].  
39  
40 Some women told to rescreen in five years were happy to follow the guidelines and  
41  
42 recommendations, whereas others, particularly those with a history of abnormal results, were  
43  
44 wanting further reassurance and said they would rescreen more frequently [Q24].  
45  
46

47 One older woman, who was not aware of the high prevalence of HPV, alluded to the stigma  
48  
49 associated with an HPV+ result, however there were few instances of women expressing  
50  
51 feelings of stigma about being HPV+ [Q25]. Women showed more limited understanding of  
52  
53 accompanying cytology changes; especially amongst women with normal cytology and low-  
54  
55 grade abnormalities. Women with high-grade abnormalities had better understanding, mainly  
56  
57

1  
2  
3 because they had a persistent form of HPV and had previously returned abnormal results and/or  
4 had also been referred to a gynaecologist for a subsequent colposcopy. Only a couple of  
5 women recalled their level of risk (e.g. intermediate risk) for cervical cancer.  
6  
7  
8

9  
10 Women who were HPV+ talked about their understanding and experiences of the new testing  
11 pathway, with one woman describing how the doctor explained it to her using the flowcharts  
12 [Q26].  
13  
14  
15

16  
17 There were some women who felt that healthcare professionals had not adequately explained  
18 their results to them. Some women felt the information was not made relevant to them or was  
19 too clinical, and that they wanted to be given more detail with their results. These women  
20 conducted their own research online to find out more about HPV and what their results meant  
21 [Q27].  
22  
23  
24  
25  
26

## 27 **DISCUSSION**

28  
29  
30 The study findings contribute to our understanding of women's experiences of the deintensified  
31 cervical screening program in Australia and provide us with insight into how women have  
32 interpreted communication of their test results. Overall, women showed limited knowledge of the  
33 changes to the NCSP, but demonstrated understanding about what the results meant for them  
34 and their future screening. There was high variability in how the results were communicated to  
35 women by their GP/other health professional. Some women reported positive experiences of  
36 communication which provided reassurance and aided good understanding of the changes and  
37 implications of results, while others reported poor communication of results by their GP/other  
38 health professional and felt they had to independently search for further information. The impact  
39 of HPV+ results appeared greater in women who had previously had normal Pap smear results.  
40 Encouragingly, women envisaged that the changes to the NCSP would have minimal impact on  
41 their own screening behaviour. A few women were concerned about changes to the program  
42  
43  
44  
45  
46  
47  
48  
49  
50  
51  
52  
53  
54  
55  
56  
57  
58  
59  
60



1  
2  
3 leading to missing cancers and getting lost in the system if they moved interstate. These  
4 findings mirror those from previous research.<sup>14,20</sup>  
5  
6

7  
8 Women in this sample were mainly positive about the changes to the program, reflected in  
9 comments about the new cervical screening test and perceived the test to be more accurate  
10 and effective than the Pap smear. This perhaps reflects a trust in decision-makers, that despite  
11 some negative press surrounding the changes, women in this sample trusted that the changes  
12 had been made for the better and this was reinforced for some when they were advised by their  
13 GP to wait for the new program to be implemented.  
14  
15  
16  
17  
18  
19

20  
21 It was evident that women still lacked knowledge about HPV and its transmission, particularly in  
22 women who were HPV-, and so there is still a great need for community education surrounding  
23 cervical screening and HPV. Linking the HPV vaccination to the changes made to the screening  
24 program, gave women a tangible way in which to understand reasons for the five-year interval  
25 being safe. This could be a good strategy to target both mothers and their daughters to educate  
26 them about the importance of cervical screening and how advances in technology has enabled  
27 us to now screen primarily for the HPV infection.  
28  
29  
30  
31  
32  
33  
34  
35

36  
37 Although this sample of women mainly reported being told in their GP consultation about the  
38 changes in the test and the screening interval, most indicated that they would have liked to have  
39 received some written information and also seen some public advertisements about the  
40 program changes, supporting our previous findings.<sup>21</sup> Women also wanted written information  
41 about the test results and expressed importance that this is consistent across the program. In  
42 addition, how women receive their results should also be standardised, as women in this  
43 sample described multiple ways of receiving their results (e.g. phone, person, letter). Some  
44 women in this sample reported that they did not know or remember their test results. Our own  
45 survey data has shown anxiety and distress were higher in women who did not know their  
46 results compared to those who were HPV-.<sup>11</sup> The recommendations provided by the women in  
47  
48  
49  
50  
51  
52  
53  
54  
55  
56  
57

1  
2  
3 this sample for information delivery to be staged across the screening journey, from prior to  
4 screening to receiving the results, are important to consider when implementing a new  
5 screening test to help women's understanding of both the reasons for the new test and what the  
6 results of the new test mean for them. Women have been shown to prefer active or shared  
7 decision making approaches regarding the follow-up of abnormal test results,<sup>22</sup> so it is important  
8 women understand what these results mean for them.  
9  
10  
11  
12  
13  
14  
15

16 Encouragingly, women reported that their doctors communicated with them about the new test  
17 and what this now checks for, with women showing an understanding behind the reason for the  
18 change in test. This is important as our previous research showed that communicating to  
19 women about the change in test can then help provide reassurance and understanding to  
20 women about some of the other changes to the program.<sup>21</sup>  
21  
22  
23  
24  
25  
26

27 The psychosocial impact of screening and test results was evident across the sample,  
28 particularly with women screened HPV+. When worry and anxiety were expressed by these  
29 women, this was mostly related to testing, results and the extended screening interval. A focus  
30 needs to be given to information provision for those women who are HPV+ and who have not  
31 experienced abnormal results in the past. It is important that they receive the information they  
32 need to alleviate anxiety as these women demonstrated greater anxiety than women who were  
33 HPV+ with experience of previous abnormalities. Women with previous abnormalities were less  
34 alarmed by their results due to their previous experience and having a greater knowledge of the  
35 system, but those who screen HPV- who have a history of previous abnormalities may prefer to  
36 be screened more frequently.  
37  
38  
39  
40  
41  
42  
43  
44  
45  
46  
47  
48

49 Encouragingly, there was a good understanding among women who were HPV+ that cancer  
50 was not inevitable and that some cell changes might resolve without the need for treatment,  
51 demonstrating good communication from health professionals. This is particularly encouraging  
52 given around 8% of women (n=195,606) tested HPV+ in the first 6 months of the renewed  
53  
54  
55  
56  
57

1  
2  
3 program.<sup>23</sup> Of important note is that this, combined with healthcare providers not adhering to the  
4  
5 guidelines, has consequently resulted in the increase in number of colposcopy referrals being  
6  
7 much greater than expected.<sup>24</sup> This holds implications for an increased number of women  
8  
9 referred for colposcopy and experiencing long wait times, as awaiting to undergo colposcopy  
10  
11 has been shown to increase anxiety levels.<sup>25</sup>  
12  
13

## 14 **Conclusions**

15  
16  
17 Despite women demonstrating an understanding about the new cervical screening test, more  
18  
19 written information and public communication about the changes and possible results are  
20  
21 warranted. In particular, efforts are needed to ensure women who are HPV+ with no history of  
22  
23 abnormal results receive the information they need to alleviate anxiety. Tailored information  
24  
25 could take into consideration women's previous cervical screening results and risk for a  
26  
27 significant cervical abnormality.  
28  
29

30 **Ethics approval and consent to participate:** This study was approved by The University of  
31  
32 Sydney Human Ethics Committee (2018/836).  
33  
34

35 **Data availability:** The datasets generated and/or analysed during the study are available from  
36  
37 the corresponding author on reasonable request.  
38  
39

40 **Funding:** This work was supported by a National Health and Medical Research Council  
41  
42 Program Grant (APP1113532).  
43  
44

45 **Patient consent for publication:** Not required.  
46  
47

48 **Disclosure of interests:** None declared  
49

50 **Author Statement: Rachael Dodd:** Conceptualization, Data curation, Formal analysis,  
51  
52 Investigation, Methodology, Project administration, Writing – Original draft preparation **Olivia**  
53

54 **Mac:** Formal analysis, Writing – Reviewing and Editing; **Kirsten McCaffery:** Conceptualization,  
55  
56  
57  
58  
59  
60

Methodology, Funding acquisition, Formal analysis, Validation, writing – review and editing. All authors contributed to the interpretation of the analysis and critically revised the manuscript.

**Acknowledgements:** We thank Dynata for recruitment services, Alana Fisher for her input and support with data collection, and all study participants.

## REFERENCES

1. Machalek, D. A. *et al.* Very Low Prevalence of Vaccine Human Papillomavirus Types among 18- to 35-Year Old Australian Women 9 Years Following Implementation of Vaccination. *J. Infect. Dis.* **217**, 1590–1600 (2018).
2. Australian Institute of Health and Welfare. *Cervical screening in Australia 2019.* (2019).
3. American Cancer Society. The American Cancer Society Guidelines for the Prevention and Early Detection of Cervical Cancer. (2018). Available at: <https://www.cancer.org/cancer/cervical-cancer/prevention-and-early-detection/cervical-cancer-screening-guidelines.html>. (Accessed: 20th June 2019)
4. Polman, N. J., Snijders, P. J. F., Kenter, G. G., Berkhof, J. & Meijer, C. J. L. M. HPV-based cervical screening: Rationale, expectations and future perspectives of the new Dutch screening programme. *Prev. Med. (Baltim)*. **119**, 108–117 (2019).
5. McBride, E. *et al.* Anxiety and distress following receipt of results from routine HPV primary testing in cervical screening: the Psychological Impact of Primary Screening (PIPS) study. *Int. J. Cancer* **June**, (2019).
6. Medical Services Advisory Committee. *National Cervical Screening Program Renewal: Evidence Review (Assessment Report).* MSAC Application No. 1276. (2013).
7. Anderson, L., Saville, M. & Wright, G. Cancer Council Australia Cervical Cancer Screening Guidelines Working Party. (2018). Available at:

- 1  
2  
3 [https://wiki.cancer.org.au/australia/Guidelines:Cervical\\_cancer/Screening/Sample\\_cervical\\_screening\\_reports](https://wiki.cancer.org.au/australia/Guidelines:Cervical_cancer/Screening/Sample_cervical_screening_reports).
- 4  
5  
6  
7
8. McCaffery, K. *et al.* Testing positive for human papillomavirus in routine cervical screening: examination of psychosocial impact. *BJOG* **111**, 1437–43 (2004).
- 9  
10  
11
9. McCaffery, K., Waller, J., Nazroo, J. & Wardle, J. Social and psychological impact of HPV testing in cervical screening: a qualitative study. *Sex. Transm. Infect.* **82**, 169–74 (2006).
- 12  
13  
14  
15  
16
10. McCaffery, K. *et al.* Attitudes towards HPV testing: A qualitative study of beliefs among Indian, Pakistani, African-Caribbean and white British women in the UK. *Br. J. Cancer* **88**, 42–46 (2003).
- 17  
18  
19  
20  
21  
22  
23
11. Dodd, R. H., Mac, O., Brotherton, J. M. L., Cvejic, E. & McCaffery, K. J. Levels of anxiety and distress following receipt of positive screening tests in Australia's HPV-based cervical screening programme: a cross-sectional survey. *Sex. Transm. Infect.* 1–7 (2020).  
doi:10.1136/sextrans-2019-054290
- 24  
25  
26  
27  
28  
29  
30  
31  
32
12. McBride, E. *et al.* Psychological Impact of Primary Screening ( PIPS ) for HPV : a protocol for a cross-sectional evaluation within the NHS cervical screening programme. *BMJ Open* **6**, e014356 (2016).
- 33  
34  
35  
36  
37  
38  
39
13. Guest, G., Bunce, A. & Johnson, L. How many interviews are enough? An experiment with data saturation and variability. *Field methods* **18**, 59–82 (2006).
- 40  
41  
42  
43
14. Obermair, H., Dodd, R., Jansen, J., Bonner, C. & McCaffery, K. J. "It has saved thousands of lives, so why change it?" Content analysis of objections to cervical screening programme changes in Australia. *BMJ Open* **8**, e019171 (2018).
- 44  
45  
46  
47  
48  
49  
50
15. Jayasinghe, Y. *et al.* Primary HPV DNA based cervical cancer screening at 25 years: Views of young Australian women aged 16-28 years. *J. Clin. Virol.* **76**, S74–S80 (2016).
- 51  
52  
53  
54  
55  
56  
57

- 1  
2  
3 16. Scalzo, K. & Mullins, R. The recommended interval for cervical cancer screening:  
4  
5 Victorian women's attitudes to an extended interval. *Aust. N. Z. J. Public Health* **39**, 153–  
6  
7 156 (2015).  
8  
9
- 10 17. Ogilvie, G. S. *et al.* Correlates of women's intentions to be screened for human  
11  
12 papillomavirus for cervical cancer screening with an extended interval. *BMC Public*  
13  
14 *Health* **16**, 213 (2016).  
15
- 16 18. Ogilvie, G. S. *et al.* Women's intentions to receive cervical cancer screening with primary  
17  
18 human papillomavirus testing. *Int. J. Cancer* **133**, 2934–2943 (2013).  
19
- 20 19. QSR. *NVivo qualitative data analysis Software Version 11.* (QSR International Pty Ltd.,  
21  
22 2015).  
23  
24  
25
- 26 20. Dodd, R. H., Obermair, H. M. & McCaffery, K. J. A thematic analysis of attitudes toward  
27  
28 changes to cervical screening in Australia. *JMIR Cancer* **5**, 1–9 (2019).  
29  
30
- 31 21. Dodd, R. *et al.* Examining the information needed for acceptance of de-intensified  
32  
33 screening programs: qualitative focus groups about cervical screening in Australia. *BMJ*  
34  
35 *Open* **9**, e029319 (2019).  
36  
37
- 38 22. Dieng, M., Trevena, L., Turner, R., Wadolowski, M. & McCaffery, K. What Australian  
39  
40 women want and when they want it: cervical screening testing preferences, decision-  
41  
42 making styles and information needs. *Heal. Expect.* **16**, 177–88 (2013).  
43  
44
- 45 23. Machalek, D. A. *et al.* Routine cervical screening by primary HPV testing: early findings in  
46  
47 the renewed National Cervical Screening Program. *Med. J. Aust.* mja2.50223 (2019).  
48  
49 doi:10.5694/mja2.50223  
50
- 51 24. Smith, M., Hammond, I. & Saville, M. Lessons from the renewal of the National Cervical  
52  
53 Screening Program in Australia. *Public Heal. Res. Pract.* **29**, 1–6 (2019).  
54  
55  
56  
57

- 1  
2  
3 25. Rogstad, K. E. The psychological impact of abnormal cytology and colposcopy. *BJOG An*  
4  
5 *Int. J. Obstet. Gynaecol.* **109**, 364–368 (2002).  
6  
7  
8 26. Canfell, K., Hammond, I., Saville, M. & Cancer Council Australia Cervical Cancer  
9  
10 Screening Guidelines Working Party. National Cervical Screening Program: Guidelines  
11  
12 for the management of screen-detected abnormalities, screening in specific populations  
13  
14 and investigation of abnormal vaginal bleed. (2018). Available at:  
15  
16 <https://wiki.cancer.org.au/australiawiki/index.php?oldid=190197>, cited 2019 Mar 26].  
17  
18 (Accessed: 27th March 2019)  
19  
20  
21  
22  
23  
24  
25  
26  
27  
28  
29  
30  
31  
32  
33  
34  
35  
36  
37  
38  
39  
40  
41  
42  
43  
44  
45  
46  
47  
48  
49  
50  
51  
52  
53  
54  
55  
56  
57  
58  
59  
60

1  
2  
3 **Figure 1: Australian National Cervical Screening Program results pathway<sup>26</sup>**  
4  
5  
6  
7  
8  
9  
10  
11  
12  
13  
14  
15  
16  
17  
18  
19  
20  
21  
22  
23  
24  
25  
26  
27  
28  
29  
30  
31  
32  
33  
34  
35  
36  
37  
38  
39  
40  
41  
42  
43  
44  
45  
46  
47  
48  
49  
50  
51  
52  
53  
54  
55  
56  
57  
58  
59  
60

For peer review only



**Table 1: Sampling frame**

|                            | Education     |                       | Age |       |       |     | HPV vaccine |    |
|----------------------------|---------------|-----------------------|-----|-------|-------|-----|-------------|----|
|                            | No University | University or Diploma | <35 | 36-50 | 51-65 | 66+ | Yes         | No |
| <b>Cervical Screening</b>  |               |                       |     |       |       |     |             |    |
| <b>Test Result</b>         |               |                       |     |       |       |     |             |    |
| <b>HPV positive (n=15)</b> |               |                       |     |       |       |     |             |    |
| 16/18                      | 2             | 2                     | 2   | 2     | 0     | 0   | 1           | 3  |
| Other                      | 0             | 6                     | 1   | 3     | 1     | 1   | 2           | 4  |
| Don't know/unsure          | 2             | 3                     | 1   | 1     | 2     | 1   | 2           | 3  |
| <b>HPV negative (n=8)</b>  |               |                       |     |       |       |     |             |    |
| Don't know/unsure (n=3)    | 2             | 1                     | 2   | 0     | 1     | 0   | 2           | 1  |

NB: numbers total n under each test result across the columns of education, age and HPV vaccine.

**Table 2: Sample characteristics**

|                                   | n (%)     |
|-----------------------------------|-----------|
| <b>HPV status</b>                 |           |
| HPV+ high risk                    | 4 (15.4)  |
| HPV+ other risk                   | 6 (23.1)  |
| HPV+ don't know/unsure            | 5 (19.2)  |
| HPV negative                      | 8 (30.8)  |
| Don't know/unsure result          | 3 (11.5)  |
| <b>Age</b>                        |           |
| <35                               | 9 (34.6)  |
| 36-50                             | 7 (26.9)  |
| 51-65                             | 7 (26.9)  |
| 66+                               | 3 (11.5)  |
| <b>Education</b>                  |           |
| No university                     | 18 (69.2) |
| University                        | 8 (30.8)  |
| <b>Employment</b>                 |           |
| Full-time                         | 8 (30.8)  |
| Part-time                         | 7 (26.9)  |
| Retired/studying/other            | 11 (42.3) |
| <b>Born in Australia</b>          |           |
| Yes                               | 22 (84.6) |
| No                                | 4 (15.4)  |
| <b>Marital status</b>             |           |
| Single/dating                     | 5 (19.2)  |
| Married/living with partner       | 13 (50.0) |
| Partnered/not living with partner | 1 (3.8)   |
| Separated or divorced             | 6 (23.1)  |
| Widowed                           | 1 (3.8)   |
| <b>HPV vaccination</b>            |           |
| Yes                               | 9 (34.6)  |
| No/don't know                     | 17 (65.3) |

**Table 3: Quotes from interviews to support the themes**

| Code                                         | Quote                                                                                                                                                                                                                                                                                                                                                                                                                                                                                                 | Page |
|----------------------------------------------|-------------------------------------------------------------------------------------------------------------------------------------------------------------------------------------------------------------------------------------------------------------------------------------------------------------------------------------------------------------------------------------------------------------------------------------------------------------------------------------------------------|------|
| <b>Knowledge and attitudes about changes</b> |                                                                                                                                                                                                                                                                                                                                                                                                                                                                                                       |      |
| Q1                                           | <i>I did see I think a couple of little pop up things about it and I know that a couple of girls in my social circle have mentioned that the new test was available and it was a five year screening, but I haven't seen any other information about what difference it will make. (HPV-, 33 years old, unvaccinated, University degree)</i>                                                                                                                                                          | 8    |
| Q2                                           | <i>I spent a couple of hours actually looking into everything I could find. Just even about HPV itself because I didn't understand any of it. It was really useful ... but I had to actually go looking for it. It wasn't something that was put out there ... If it had been out there it may have been discussed and I might have known a bit more ... It would've been good to have been publicly informed in some ways. (HPV+ (not sure), 46 years old, unvaccinated, Diploma or certificate)</i> | 8    |
| Q3                                           | <i>Well I know that the main change is you only have to go every five years and not every two years because they've developed a different way to look at the cells or something (HPV+ (not 16/18), 30 years old, vaccinated, Diploma or certificate)</i>                                                                                                                                                                                                                                              | 8    |
| Q4                                           | <i>From what I understand, the technology is drastically improved which means obviously its better technology and they trust the technology better. I think the fact they're tracking the virus that causes the cancer is really good. (HPV-, 47 years old, unvaccinated, Diploma or certificate)</i>                                                                                                                                                                                                 | 9    |
| Q5                                           | <i>I think in all honestly my experience is it's the same ... I can't say I've noticed any change to be honest. (HPV+ 16/18 &amp; CIN1, 37 years old, unvaccinated, Trade apprenticeship)</i>                                                                                                                                                                                                                                                                                                         | 9    |
| Q6                                           | <i>My instant reaction is horror because that's a long time without a Pap smear because you don't know what your body is doing. In there if you've got cancer somewhere in that area, it's got five years to spread. (HPV+ (not sure), 66 years old, unvaccinated, School certificate)</i>                                                                                                                                                                                                            | 9    |
| Q7                                           | <i>Well the fact that if it's done every five as opposed to two then obviously having to go for less testing, is less anxiety and less stress so on that basis that's good ... If I have to only do it once every five years it's very positive in my view. I think it will encourage more people to do it because it's not something that you have to do that often. (HPV+ (not 16/18), 41 years old, unvaccinated, University degree)</i>                                                           | 9    |
| Q8                                           | <i>What's easier now is I don't have to come back for another test and wait for a result then be told now you have to go to a specialist. The fact I knew immediately that's what the next step was really good. That was really positive. (HPV+ (not sure), 46 years old, unvaccinated, Diploma or certificate)</i>                                                                                                                                                                                  | 9    |
| Q9                                           | <i>I do have concerns as to whether the HPV is over testing, are you finding things that are not meant to be there - is it over diagnosis as well which leads to unnecessary treatments, unnecessary follow ups and referrals. That did</i>                                                                                                                                                                                                                                                           | 9    |

|                                                                        |                                                                                                                                                                                                                                                                                                                                                                                                                                                                            |    |
|------------------------------------------------------------------------|----------------------------------------------------------------------------------------------------------------------------------------------------------------------------------------------------------------------------------------------------------------------------------------------------------------------------------------------------------------------------------------------------------------------------------------------------------------------------|----|
|                                                                        | <i>cross my mind. (HPV+ (not 16/18), 41 years old, unvaccinated, University degree)</i>                                                                                                                                                                                                                                                                                                                                                                                    |    |
| Q10                                                                    | <i>Because you're immunising your girls against the HPV they will be less likely to get cervical cancer, which is why they only have to be screened five yearly. (HPV-, 47 years old, unvaccinated, Diploma or certificate)</i>                                                                                                                                                                                                                                            | 9  |
| <b>Information Dissemination</b>                                       |                                                                                                                                                                                                                                                                                                                                                                                                                                                                            |    |
| Q11                                                                    | <i>Just about the difference now that they're testing for the virus that causes the cell changes rather than testing for cell changes, you can catch things earlier and prevent them. (HPV+ (16/18), 44 years old, unvaccinated, School certificate)</i>                                                                                                                                                                                                                   | 10 |
| Q12                                                                    | <i>I was due to have one, I don't know what month it was, last year and she said wait till December because then they've got a new test. I didn't really worry about it - I mean I haven't had any negative [sic] results (i.e. abnormal) so she just said in December they're doing it a different way so do you want to wait till December. (HPV-, 61 years old, unvaccinated, School certificate)</i>                                                                   | 10 |
| Q13                                                                    | <i>She explained the process and how the test works and exactly what she does and how they get the samples and how it's tested. I was quite happy with the extent of the information that she provided. It coincided with my understanding of the test and what the results would show or not. (HPV-, 29 years old, vaccinated, Higher School Certificate)</i>                                                                                                             | 10 |
| Q14                                                                    | <i>I didn't end up getting it that day. Then ... sent out a request to my old postal address, saying that I was on a high priority list to get it done. They called me up and apologised about it ... The Doctor ... she didn't really believe me again so she called up [Path lab] and asked them if I really needed to be there and they said yes, she's on the priority listing or urgent listing. (HPV+ 16/18, 26 years old, unvaccinated, Diploma or certificate)</i> | 10 |
| Q15                                                                    | <i>I think there needs to be an ad done about it because it's prevalent it's there every day it's something women have to have done. It's an element that goes around and I think the public need to be more informed. TV ads, radio ads I think, internet ads because younger generation take much more notice of them. (HPV+ (not sure type), 46 years old, unvaccinated, Diploma or certificate)</i>                                                                    | 10 |
| Q16                                                                    | <i>Maybe it could be a brochure and a conversation from your GP or kind of the Doctor/gynaecologist whoever you're communicating with so that they can ask questions and then you have some information to go back and read if you want to. I don't know then I suppose on the brochure if there is a phone number for people to call if they have further questions. (HPV+ not 16/18 &amp; negative cytology, 49 years old, unvaccinated, University degree)</i>          | 11 |
| <b>Meaning of test results and emotional responses to the new test</b> |                                                                                                                                                                                                                                                                                                                                                                                                                                                                            |    |
| Q17                                                                    | <i>Results, no. They only really call you in for results if something is wrong and they need to discuss it otherwise you don't sort of hear from them. I would've liked just an acknowledgement to say that everything is fine instead of just assuming. Even if it was only a short email or something. (HPV unknown, 51 years old, unvaccinated, no school or other qualifications)</i>                                                                                  | 11 |

|     |                                                                                                                                                                                                                                                                                                                                                                                                                                                                                            |    |
|-----|--------------------------------------------------------------------------------------------------------------------------------------------------------------------------------------------------------------------------------------------------------------------------------------------------------------------------------------------------------------------------------------------------------------------------------------------------------------------------------------------|----|
| Q18 | <i>Oh, I was a little bit nervous. I didn't think that I was a high candidate to have issues. Still it's the first time I've done the test I could've had a dormant virus or something for a few years and not known about it. It was just generally, because I've never done it, I'm uncertain it might have been an underlying problem I had never known about but it wasn't so that was good. (HPV-, 29 years old, vaccinated, Higher School Certificate)</i>                           | 11 |
| Q19 | <i>It didn't mean that I would get cancer but I would have a more increased risk and now I would have to have yearly Pap smears and they will be tested the old way to detect changes in my cells because we know I've already got the HPV virus. (HPV+ 16/18 &amp; negative cytology, 44 years old, unvaccinated, School certificate)</i>                                                                                                                                                 | 12 |
| Q20 | <i>I'm glad nothing is wrong but it's a little daunting knowing I'm in that increased risk group ... Like I said to my husband it's more when I have my Pap smear every year now rather than not thinking about it because it's been normal for so long, now that I've got the virus I think I will be a little bit more anxious till I get the result now. (HPV+ 16/18 &amp; negative cytology, 44 years old, unvaccinated, school certificate)</i>                                       | 12 |
| Q21 | <i>Well I would believe that it would mean I wouldn't need to go back for five years however given that I've had abnormal test results in the past I think I will probably still get one done two years after that test just to make sure and if that's clear then I would be reassured I could then go to five yearly screening ... I think I will take myself to another test.</i>                                                                                                       | 12 |
| Q22 | <i>Probably explaining more about it, how you can get it. I think already having the pamphlet what it can turn into, cervical cancer and things like that. While you're having the Pap smear I think so too and also if you have to go to get a procedure like a biopsy or whatever just to explain it again. (HPV+ 16/18 &amp; CIN1, 37 years old, unvaccinated, Trade apprenticeship)</i>                                                                                                | 12 |
| Q23 | <i>Yeah, I will be making it [appointment] for when the 12 months is up for sure. Now I have a better understanding I'm okay with it and going back in 12 months it's fine. Hopefully it will be gone and if it's not go back in another 12 months or whatever the threshold is. My initial reaction was I have to wait 12 months, I'm going to have to worry about this for 12 months but now I'm okay about it. (HPV+ (not 16/18), 30 years old, vaccinated, Diploma or certificate)</i> | 12 |
| Q24 | <i>Well I would believe that it would mean I wouldn't need to go back for five years however given that I've had abnormal test results in the past I think I will probably still get one done two years after that test just to make sure and if that's clear then I would be reassured I could then go to five yearly screening. (HPV-, 33 years old, unvaccinated, University degree)</i>                                                                                                | 12 |
| Q25 | <i>I hadn't had sex for years ... the diagnosis I got from the Pap smear [is] normally [for] people [who] are sexually active. I thought it was some kind of an STI and then when I thought about it I thought I hadn't been with anyone for years, how did I get this unless it's been in the body for years and shown up now. (HPV+ (not sure), 66 years old, unvaccinated, School certificate)</i>                                                                                      | 12 |
| Q26 | <i>That's how it was explained and then when he was going through the flow charts and stuff about when you get this and then we have to do this next</i>                                                                                                                                                                                                                                                                                                                                   | 13 |

|     |                                                                                                                                                                                                                                                                                                                      |    |
|-----|----------------------------------------------------------------------------------------------------------------------------------------------------------------------------------------------------------------------------------------------------------------------------------------------------------------------|----|
|     | <i>treatment. (HPV+ (not 16/18) &amp; negative cytology, 49 years old, University degree)</i>                                                                                                                                                                                                                        |    |
| Q27 | <i>She just pretty much said how most people do have the virus; she wasn't particularly good at explaining it. It was just lucky that I've already been to so many Doctors who are better at explaining it so I've got a general understanding. (HPV+ 16/18, 26 years old, unvaccinated, Diploma or certificate)</i> | 13 |

For peer review only

1  
2  
3  
4  
5  
6  
7  
8  
9  
10  
11  
12  
13  
14  
15  
16  
17  
18  
19  
20  
21  
22  
23  
24  
25  
26  
27  
28  
29  
30  
31  
32  
33  
34  
35  
36  
37  
38  
39  
40  
41  
42  
43  
44  
45  
46  
47

**Figure 1: Australian National Cervical Screening Program results pathway**

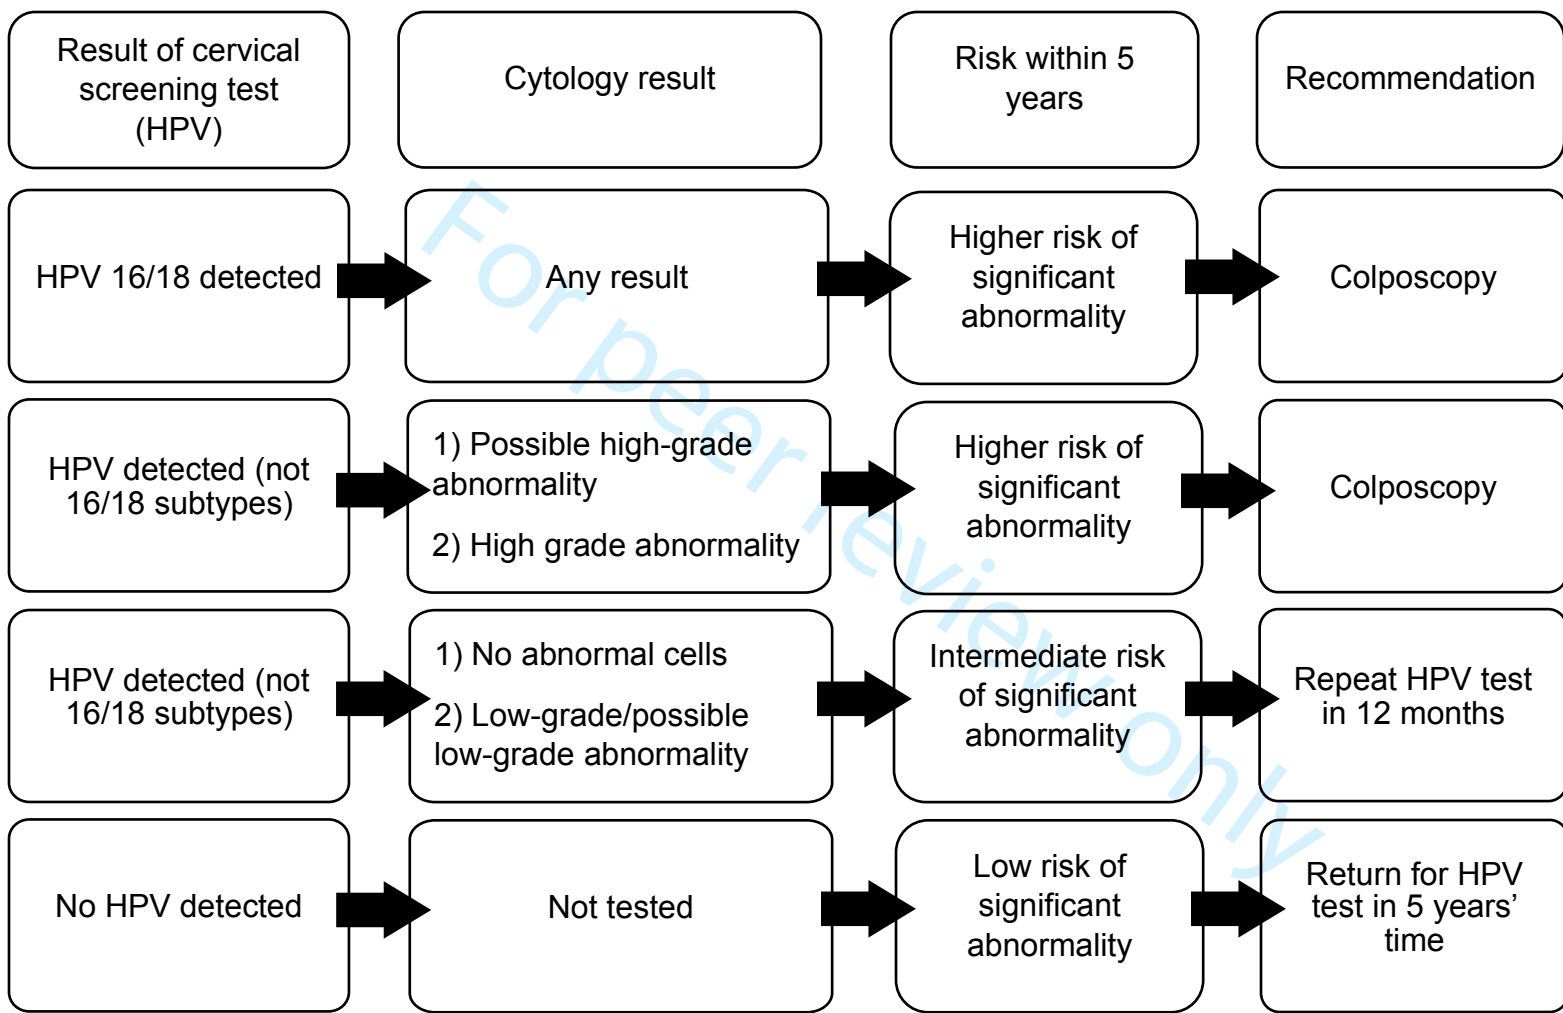

**Supplementary Information: Interview topic guide**

1. Knowledge of renewed cervical screening program
2. Last attendance for cervical screen (how came about attending, what happened, results, implications of results)
3. Exploring what/if told about results and how
4. Understanding of results and what they mean
5. Thoughts/feelings on results, any impact of results
6. Awareness of changes before December 2017 (what/how heard; thoughts on/expectations about the changes)
7. Experience of cervical screening since renewed program
8. General thoughts/feelings on the changes to the cervical screening program
9. Whether doctor shared thoughts on the changes
10. Anything made it difficult to participate in screening since renewal (challenges/barriers)
11. Anything made it easier to participate in screening since renewal (enablers/facilitators) that may be different to you attending previously for cervical screening?
12. Changes (positive/negative) made or experienced seeing doctor for cervical screening/other health issues
13. Changes (positive/negative) towards seeing doctor for cervical screening/other health issues in the future
14. Explore information given from doctor about the changes
15. Explore educational materials or other resources helped better understand
16. Recommendations for educational materials or other resources for women eligible for screening (content/format/delivery)
17. Any other comments about renewed cervical screening program/anything else



# Reporting checklist for qualitative study.

Based on the SRQR guidelines.

## Instructions to authors

Complete this checklist by entering the page numbers from your manuscript where readers will find each of the items listed below.

Your article may not currently address all the items on the checklist. Please modify your text to include the missing information. If you are certain that an item does not apply, please write "n/a" and provide a short explanation.

Upload your completed checklist as an extra file when you submit to a journal.

In your methods section, say that you used the SRQR reporting guidelines, and cite them as:

O'Brien BC, Harris IB, Beckman TJ, Reed DA, Cook DA. Standards for reporting qualitative research: a synthesis of recommendations. Acad Med. 2014;89(9):1245-1251.

|              |                                                                                                                                                                                                                                                                | Page   |
|--------------|----------------------------------------------------------------------------------------------------------------------------------------------------------------------------------------------------------------------------------------------------------------|--------|
|              | Reporting Item                                                                                                                                                                                                                                                 | Number |
| <b>Title</b> | <p><a href="#">#1</a> Concise description of the nature and topic of the study identifying the study as qualitative or indicating the approach (e.g. ethnography, grounded theory) or data collection methods (e.g. interview, focus group) is recommended</p> | 1      |

## Abstract

[#2](#) Summary of the key elements of the study using the abstract format of the intended publication; typically includes background, purpose, methods, results and conclusions

## Introduction

[#3](#) Description and significance of the problem / phenomenon studied: review of relevant theory and empirical work; problem statement

[#4](#) Purpose of the study and specific objectives or question

## Methods

[#5](#) Qualitative approach and research paradigm

Qualitative approach (e.g. ethnography, grounded theory, case study, phenomenology, narrative research) and guiding theory if appropriate; identifying the research paradigm (e.g. postpositivist, constructivist / interpretivist) is also recommended; rationale. The rationale should briefly discuss the justification for choosing that theory, approach, method or technique rather than other options available; the assumptions and limitations implicit in those choices and how those choices influence study conclusions and transferability.

As appropriate the rationale for several items might be discussed together.

|    |                           |                     |    |
|----|---------------------------|---------------------|----|
| 1  |                           |                     |    |
| 2  |                           |                     |    |
| 3  |                           |                     |    |
| 4  |                           |                     |    |
| 5  |                           |                     |    |
| 6  | Researcher                | <a href="#">#6</a>  | 8  |
| 7  |                           |                     |    |
| 8  | characteristics and       |                     |    |
| 9  |                           |                     |    |
| 10 | reflexivity               |                     |    |
| 11 |                           |                     |    |
| 12 |                           |                     |    |
| 13 |                           |                     |    |
| 14 |                           |                     |    |
| 15 |                           |                     |    |
| 16 |                           |                     |    |
| 17 |                           |                     |    |
| 18 |                           |                     |    |
| 19 |                           |                     |    |
| 20 |                           |                     |    |
| 21 |                           |                     |    |
| 22 | Context                   | <a href="#">#7</a>  | 6  |
| 23 |                           |                     |    |
| 24 |                           |                     |    |
| 25 | Sampling strategy         | <a href="#">#8</a>  | 7  |
| 26 |                           |                     |    |
| 27 |                           |                     |    |
| 28 |                           |                     |    |
| 29 |                           |                     |    |
| 30 |                           |                     |    |
| 31 |                           |                     |    |
| 32 |                           |                     |    |
| 33 |                           |                     |    |
| 34 |                           |                     |    |
| 35 | Ethical issues pertaining | <a href="#">#9</a>  | 16 |
| 36 |                           |                     |    |
| 37 | to human subjects         |                     |    |
| 38 |                           |                     |    |
| 39 |                           |                     |    |
| 40 |                           |                     |    |
| 41 |                           |                     |    |
| 42 |                           |                     |    |
| 43 |                           |                     |    |
| 44 |                           |                     |    |
| 45 | Data collection methods   | <a href="#">#10</a> | 7  |
| 46 |                           |                     |    |
| 47 |                           |                     |    |
| 48 |                           |                     |    |
| 49 |                           |                     |    |
| 50 |                           |                     |    |
| 51 |                           |                     |    |
| 52 |                           |                     |    |
| 53 |                           |                     |    |
| 54 |                           |                     |    |
| 55 |                           |                     |    |
| 56 |                           |                     |    |
| 57 |                           |                     |    |
| 58 |                           |                     |    |
| 59 |                           |                     |    |
| 60 |                           |                     |    |

|    |                         |                     |                                                          |     |
|----|-------------------------|---------------------|----------------------------------------------------------|-----|
| 1  | Data collection         | <a href="#">#11</a> | Description of instruments (e.g. interview guides,       | 7   |
| 2  |                         |                     | questionnaires) and devices (e.g. audio recorders)       |     |
| 3  | instruments and         |                     | used for data collection; if / how the instruments(s)    |     |
| 4  |                         |                     | changed over the course of the study                     |     |
| 5  | technologies            |                     |                                                          |     |
| 6  |                         |                     |                                                          |     |
| 7  |                         |                     |                                                          |     |
| 8  |                         |                     |                                                          |     |
| 9  |                         |                     |                                                          |     |
| 10 |                         |                     |                                                          |     |
| 11 | Units of study          | <a href="#">#12</a> | Number and relevant characteristics of participants,     | 8   |
| 12 |                         |                     | documents, or events included in the study; level of     |     |
| 13 |                         |                     | participation (could be reported in results)             |     |
| 14 |                         |                     |                                                          |     |
| 15 |                         |                     |                                                          |     |
| 16 |                         |                     |                                                          |     |
| 17 |                         |                     |                                                          |     |
| 18 |                         |                     |                                                          |     |
| 19 | Data processing         | <a href="#">#13</a> | Methods for processing data prior to and during          | 7   |
| 20 |                         |                     | analysis, including transcription, data entry, data      |     |
| 21 |                         |                     | management and security, verification of data integrity, |     |
| 22 |                         |                     | data coding, and anonymisation / deidentification of     |     |
| 23 |                         |                     | excerpts                                                 |     |
| 24 |                         |                     |                                                          |     |
| 25 |                         |                     |                                                          |     |
| 26 |                         |                     |                                                          |     |
| 27 |                         |                     |                                                          |     |
| 28 |                         |                     |                                                          |     |
| 29 |                         |                     |                                                          |     |
| 30 |                         |                     |                                                          |     |
| 31 | Data analysis           | <a href="#">#14</a> | Process by which inferences, themes, etc. were           | 7/8 |
| 32 |                         |                     | identified and developed, including the researchers      |     |
| 33 |                         |                     | involved in data analysis; usually references a specific |     |
| 34 |                         |                     | paradigm or approach; rationale                          |     |
| 35 |                         |                     |                                                          |     |
| 36 |                         |                     |                                                          |     |
| 37 |                         |                     |                                                          |     |
| 38 |                         |                     |                                                          |     |
| 39 |                         |                     |                                                          |     |
| 40 |                         |                     |                                                          |     |
| 41 | Techniques to enhance   | <a href="#">#15</a> | Techniques to enhance trustworthiness and credibility    | 7/8 |
| 42 |                         |                     | of data analysis (e.g. member checking, audit trail,     |     |
| 43 | trustworthiness         |                     | triangulation); rationale                                |     |
| 44 |                         |                     |                                                          |     |
| 45 |                         |                     |                                                          |     |
| 46 |                         |                     |                                                          |     |
| 47 |                         |                     |                                                          |     |
| 48 | <b>Results/findings</b> |                     |                                                          |     |
| 49 |                         |                     |                                                          |     |
| 50 |                         |                     |                                                          |     |
| 51 | Syntheses and           | <a href="#">#16</a> | Main findings (e.g. interpretations, inferences, and     | 8   |
| 52 |                         |                     | themes); might include development of a theory or        |     |
| 53 | interpretation          |                     | model, or integration with prior research or theory      |     |
| 54 |                         |                     |                                                          |     |
| 55 |                         |                     |                                                          |     |
| 56 |                         |                     |                                                          |     |
| 57 |                         |                     |                                                          |     |
| 58 |                         |                     |                                                          |     |
| 59 |                         |                     |                                                          |     |
| 60 |                         |                     |                                                          |     |

|    |                              |                     |                                                          |         |
|----|------------------------------|---------------------|----------------------------------------------------------|---------|
| 1  | Links to empirical data      | <a href="#">#17</a> | Evidence (e.g. quotes, field notes, text excerpts,       | Table 3 |
| 2  |                              |                     | photographs) to substantiate analytic findings           |         |
| 3  |                              |                     |                                                          |         |
| 4  |                              |                     |                                                          |         |
| 5  |                              |                     |                                                          |         |
| 6  | <b>Discussion</b>            |                     |                                                          |         |
| 7  |                              |                     |                                                          |         |
| 8  |                              |                     |                                                          |         |
| 9  |                              |                     |                                                          |         |
| 10 | Intergration with prior      | <a href="#">#18</a> | Short summary of main findings; explanation of how       | 13      |
| 11 | work, implications,          |                     | findings and conclusions connect to, support, elaborate  |         |
| 12 |                              |                     | on, or challenge conclusions of earlier scholarship;     |         |
| 13 | transferability and          |                     | discussion of scope of application / generalizability;   |         |
| 14 |                              |                     | identification of unique contributions(s) to scholarship |         |
| 15 | contribution(s) to the field |                     | in a discipline or field                                 |         |
| 16 |                              |                     |                                                          |         |
| 17 |                              |                     |                                                          |         |
| 18 |                              |                     |                                                          |         |
| 19 |                              |                     |                                                          |         |
| 20 |                              |                     |                                                          |         |
| 21 |                              |                     |                                                          |         |
| 22 |                              |                     |                                                          |         |
| 23 |                              |                     |                                                          |         |
| 24 | Limitations                  | <a href="#">#19</a> | Trustworthiness and limitations of findings              | 4       |
| 25 |                              |                     |                                                          |         |
| 26 |                              |                     |                                                          |         |
| 27 | <b>Other</b>                 |                     |                                                          |         |
| 28 |                              |                     |                                                          |         |
| 29 |                              |                     |                                                          |         |
| 30 | Conflicts of interest        | <a href="#">#20</a> | Potential sources of influence of perceived influence on | 16      |
| 31 |                              |                     | study conduct and conclusions; how these were            |         |
| 32 |                              |                     | managed                                                  |         |
| 33 |                              |                     |                                                          |         |
| 34 |                              |                     |                                                          |         |
| 35 |                              |                     |                                                          |         |
| 36 |                              |                     |                                                          |         |
| 37 |                              |                     |                                                          |         |
| 38 | Funding                      | <a href="#">#21</a> | Sources of funding and other support; role of funders in | 16      |
| 39 |                              |                     | data collection, interpretation and reporting            |         |
| 40 |                              |                     |                                                          |         |
| 41 |                              |                     |                                                          |         |
| 42 |                              |                     |                                                          |         |

None The SRQR checklist is distributed with permission of Wolters Kluwer © 2014 by the Association of American Medical Colleges. This checklist can be completed online using <https://www.goodreports.org/>, a tool made by the [EQUATOR Network](#) in collaboration with [Penelope.ai](#)

# BMJ Open

## Women's experiences of the renewed National Cervical Screening Program in Australia 12 months following implementation: a qualitative study

|                                 |                                                                                                                                                                                                                                                                     |
|---------------------------------|---------------------------------------------------------------------------------------------------------------------------------------------------------------------------------------------------------------------------------------------------------------------|
| Journal:                        | <i>BMJ Open</i>                                                                                                                                                                                                                                                     |
| Manuscript ID                   | bmjopen-2020-039041.R1                                                                                                                                                                                                                                              |
| Article Type:                   | Original research                                                                                                                                                                                                                                                   |
| Date Submitted by the Author:   | 19-May-2020                                                                                                                                                                                                                                                         |
| Complete List of Authors:       | Dodd, Rachael; The University of Sydney, School of Public Health<br>Mac, Olivia; The University of Sydney, Sydney Health Literacy Lab, School of Public Health<br>McCaffery, Kirsten; The University of Sydney, Sydney Health Literacy Lab, School of Public Health |
| <b>Primary Subject Heading</b>: | Qualitative research                                                                                                                                                                                                                                                |
| Secondary Subject Heading:      | Obstetrics and gynaecology, Sexual health                                                                                                                                                                                                                           |
| Keywords:                       | Community gynaecology < GYNAECOLOGY, QUALITATIVE RESEARCH, PREVENTIVE MEDICINE, PUBLIC HEALTH                                                                                                                                                                       |
|                                 |                                                                                                                                                                                                                                                                     |

SCHOLARONE™  
Manuscripts

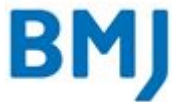

I, the Submitting Author has the right to grant and does grant on behalf of all authors of the Work (as defined in the below author licence), an exclusive licence and/or a non-exclusive licence for contributions from authors who are: i) UK Crown employees; ii) where BMJ has agreed a CC-BY licence shall apply, and/or iii) in accordance with the terms applicable for US Federal Government officers or employees acting as part of their official duties; on a worldwide, perpetual, irrevocable, royalty-free basis to BMJ Publishing Group Ltd ("BMJ") its licensees and where the relevant Journal is co-owned by BMJ to the co-owners of the Journal, to publish the Work in this journal and any other BMJ products and to exploit all rights, as set out in our [licence](#).

The Submitting Author accepts and understands that any supply made under these terms is made by BMJ to the Submitting Author unless you are acting as an employee on behalf of your employer or a postgraduate student of an affiliated institution which is paying any applicable article publishing charge ("APC") for Open Access articles. Where the Submitting Author wishes to make the Work available on an Open Access basis (and intends to pay the relevant APC), the terms of reuse of such Open Access shall be governed by a Creative Commons licence – details of these licences and which [Creative Commons](#) licence will apply to this Work are set out in our licence referred to above.

Other than as permitted in any relevant BMJ Author's Self Archiving Policies, I confirm this Work has not been accepted for publication elsewhere, is not being considered for publication elsewhere and does not duplicate material already published. I confirm all authors consent to publication of this Work and authorise the granting of this licence.

1  
2  
3  
4 **Women's experiences of the renewed National Cervical Screening Program in Australia**  
5  
6 **12 months following implementation: a qualitative study**  
7

8 Rachael H Dodd<sup>1</sup>, Olivia Mac<sup>1</sup>, Kirsten J McCaffery<sup>1</sup>  
9

10  
11 <sup>1</sup>The University of Sydney, Faculty of Medicine and Health, School of Public Health, NSW 2006,  
12  
13 Australia  
14

15  
16 Main text word count: 3935  
17

18 Abbreviations: HPV: human papillomavirus; NCSP: National Cervical Screening Program; GP:  
19  
20 General Practitioner  
21  
22

23 **Corresponding Author:** Rachael Dodd, The University of Sydney, Faculty of Medicine and  
24  
25 Health, School of Public Health, Room 127A, Edward Ford Building, Sydney, NSW 2006  
26

27  
28 T: +61 2 9351 5102; E: [Rachael.dodd@sydney.edu.au](mailto:Rachael.dodd@sydney.edu.au)  
29  
30  
31  
32  
33  
34  
35  
36  
37  
38  
39  
40  
41  
42  
43  
44  
45  
46  
47  
48  
49  
50  
51  
52  
53  
54  
55  
56  
57  
58  
59  
60



## ABSTRACT

Objective: To explore women's experiences of the renewed National Cervical Screening Program in Australia from the perspective of women who have received different human papillomavirus (HPV) test results. Women aged 25 to 74 are now screened every five years with primary HPV screening.

Design: Qualitative interview study.

Setting: Australia

Participants: Women in Australia aged 25-74 who reported participating in cervical screening since December 2017, purposively sampled by test result (HPV positive, HPV negative, HPV status unknown).

Methods: 26 interviews with women aged 25-74 were conducted and analysed thematically.

Results: Three main themes emerged: knowledge and attitudes about the program changes, information dissemination, the meaning and responses to test results and the new cervical screening test (CST). Some women showed little awareness of the changes, but others understood that HPV is detected earlier than abnormal cells. Some expressed positive attitudes towards the CST and were not anxious about less frequent screening. Most women envisaged the changes would have minimal impact on their screening behaviour. Women mainly wanted more information about the changes and the possible results from the new CST. Overall women could recall their HPV results and understand the implications for future cervical screening. Anxiety about being at 'increased risk' was more apparent in women who were HPV positive without history of abnormal results.

Conclusions: Women show some understanding of HPV and the new CST, but more written and public communication about the changes and possible results are warranted. Efforts are needed

1  
2  
3 to ensure women who are HPV positive without history of abnormal results receive the  
4  
5 information needed to alleviate anxiety.  
6

7  
8 Funding: This work was supported by a NHMRC Program Grant (APP1113532).  
9

10 Keywords: attitudes, cancer screening, [Cervical Intraepithelial Neoplasia](#), [Human Papillomavirus](#)  
11  
12 [DNA Tests](#), [Qualitative Research](#)  
13  
14  
15  
16  
17  
18  
19  
20  
21  
22  
23  
24  
25  
26  
27  
28  
29  
30  
31  
32  
33  
34  
35  
36  
37  
38  
39  
40  
41  
42  
43  
44  
45  
46  
47  
48  
49  
50  
51  
52  
53  
54  
55  
56  
57  
58  
59  
60

For peer review only

## ARTICLE SUMMARY

### Strengths and limitations of this study

- The qualitative design enabled us to explore in depth experiences of women residing in Australia who reported cervical screening since implementation of the renewed NCSP and their understanding of the results from the new cervical screening test.
- A major strength is the inclusion of women with a range of test results and provide insight into how much information women perceived they received about the new program and how they understood their test results.
- Due to the qualitative nature of the study, we cannot express the findings as generalisable across the whole population and the sample was restricted to women who could speak English.
- The method by which women were recruited into the study may reflect women who are more well-informed and therefore some caution is necessary when applying these findings to the whole population.

## INTRODUCTION

As cervical cancer prevention strategies such as the human papillomavirus (HPV) vaccination and cervical screening are increasingly successful in reducing HPV infections<sup>1</sup> and cervical abnormalities,<sup>2</sup> countries worldwide are looking to switch from primary cytology-based cervical screening to primary HPV-based screening.<sup>3-5</sup> Australia was one of the first high-income countries to implement primary HPV-based screening in the Renewal of the Australian National Cervical Screening Program (NCSP) in December 2017, where women aged 25-74 are now screened every five years with primary HPV-based screening.<sup>6</sup> Although there was an initial announcement of the changes by the Australian government in April 2014, there was no mass awareness campaign to inform the public. Significant publicity of the changes rose in early 2017 following a petition started against the changes.<sup>7</sup>

Prior to the implementation of the Renewal, women were not invited for screening, but screened when due by their primary care provider. Once women had been screened, their details were recorded on their state or territory register and women overdue for screening would receive a reminder letter. Since the Renewal, details of women who have been screened will be recorded on the National Cancer Screening Register and they will receive an invitation letter for screening when they are due and reminder letters when they are overdue.

There is no standardised approach in Australia to informing women of their results, which varies by primary care provider. Primary HPV-based screening changes the screening results women receive. In addition to being told their HPV test result (HPV positive/HPV negative), women will also receive information about their risk of a significant cervical abnormality, determined by the subtype of HPV they have (HPV 16/18 or HPV not 16/18 subtype). Women who are HPV negative (HPV-) will be told they are at low risk and are recommended to rescreen in five years' time (Figure 1)<sup>8</sup>. Women who are HPV positive (HPV+) will also have a cytology test. HPV+ women, non 16/18 subtype, who have normal cytology or low-grade abnormalities will be

1  
2  
3 informed they are at intermediate risk and will be recommended to rescreen in 12 months' time.

4  
5 Women with any HPV+ result who have abnormal cytology will be informed that they are at  
6  
7 higher risk and will be referred for a colposcopy.<sup>9</sup>  
8  
9

10 >Figure 1 here<

11  
12 Previous research has demonstrated a number of negative psychosocial impacts for women  
13  
14 testing HPV+ including anxiety and distress,<sup>10,11</sup> feelings of stigma, embarrassment and  
15  
16 confusion, as well as concerns about their sexual relationships in terms of trust, fidelity and  
17  
18 blame due to concern about the sexually transmitted nature of HPV.<sup>12</sup> Findings from our  
19  
20 previous study which surveyed over 1000 women in Australia, also showed women who tested  
21  
22 HPV+ were more anxious and distressed than those who tested HPV-,<sup>13</sup> with anxiety scores 10  
23  
24 points higher than those found in a recent English study.<sup>14</sup>  
25  
26

27  
28 As most research to date has been quantitative and conducted prior to implementing the NCSP  
29  
30 changes, there is a need for in-depth qualitative exploration of women's views and experiences  
31  
32 of the renewed NCSP in the year since its implementation. Qualitative findings can explore  
33  
34 women's first-hand experience of the new program, and their response to the new test results  
35  
36 along with their understanding of what these results mean for them, which may be useful for  
37  
38 other countries implementing primary HPV-based screening. This study aimed to explore in-  
39  
40 depth women's experiences of the renewed cervical screening program, from the perspective of  
41  
42 women who have received different test results.  
43  
44

## 45 **MATERIALS AND METHODS**

### 46 **Participants and recruitment**

47  
48 Participants were women residing in Australia who had received cervical screening since the  
49  
50 renewal of the NCSP (December 2017). Participants were recruited through a market research  
51  
52 company, Dynata during December 2018. Dynata have a database panel of 600,000 members  
53  
54  
55  
56  
57

1  
2  
3 in Australia to approach participants who meet the eligibility criteria. Participants listed on their  
4 database have already indicated a willingness to participate in online research. Women were  
5 directed to a web-link to read the participant invitation statement and provide their written  
6 consent to participate (via a tick-box) before completing an online questionnaire eliciting  
7 demographic and cervical screening information as well as psychosocial measures. At the end  
8 of the survey, women were asked if they would like to participate in a follow up interview and if  
9 yes, asked to leave their contact details so the research team could contact them.  
10  
11

12  
13  
14  
15  
16  
17  
18 Participants received points from Dynata which can be redeemed for items such as gift  
19 vouchers, donations to charities or cash. Participants first received points that represented  
20 modest compensation for the time spent completing the survey, with further points on  
21 completion of an interview.  
22  
23  
24  
25

26  
27 Participants were purposively sampled from 449 women agreeing to be contacted for interview,  
28 to include women from a range of age groups, education and test results (HPV+ 16/18, HPV+  
29 other, HPV-, HPV status unknown; Table 1). Of these 449 women, 33 were HPV+, 374 HPV-  
30 and 42 didn't know or couldn't remember their result (HPV status unknown). Data collection  
31 ceased when no new themes were emerging from the data and therefore saturation was  
32 reached.<sup>15</sup>  
33  
34  
35  
36  
37  
38  
39

40  
41 >Table 1 here<  
42

### 43 **Procedure**

44  
45  
46 Semi-structured interviews, using a purpose-designed interview guide informed by a review of  
47 previous literature on women's attitudes towards to changes to cervical screening programs,  
48 both in Australia<sup>7,16,17</sup> and overseas,<sup>18,19</sup> were conducted during December 2018.  
49  
50  
51  
52  
53  
54  
55  
56  
57

1  
2  
3 The topic guide covered questions regarding attitudes, understanding and confidence, expected  
4 impact, understanding of results, any psychosocial impacts and helpful educational and other  
5 support resources, in relation to the NCSP changes (See supplementary information).  
6  
7  
8

9  
10 Interviews took place over the telephone and lasted between 10 and 27 minutes. Interviews  
11 were audio-recorded and professionally transcribed.  
12  
13

### 14 **Patient and public involvement**

15  
16  
17 Patients and the public were not directly involved in the design or planning of the study.  
18  
19

### 20 **Analysis**

21  
22 Interviews were analysed using Framework Analysis, an approach well suited to this type of  
23 research due to the organisation of data into a thematic framework which then enables views  
24 and experiences to be grouped together and comparisons made across participants.  
25  
26  
27

28  
29 Both RD and OM familiarised themselves with the transcripts by reading over all the transcripts  
30 and making notes of recurring themes. RD developed the initial framework using the qualitative  
31 package NVivo 11.<sup>20</sup> The framework was amended through discussions between RD and OM  
32 and refined with input from KM. Using NVivo 11, data were summarised and organised into a  
33 matrix where each column represented a subtheme and each row a participant. Themes were  
34 derived from the data in an inductive process and the topic guide was not used as a reference  
35 during the analysis and interpretation of the data. Any disagreements in interpretation were  
36 resolved by discussion. The research team members work in the field of public health, with a  
37 special interest in reducing overdiagnosis and overtreatment.  
38  
39  
40  
41  
42  
43  
44  
45  
46  
47

### 48 **RESULTS**

49  
50  
51 We interviewed 26 women with sample characteristics shown in Table 2. Most women in the  
52 sample described being regular screeners (every two years). Some women in the sample had  
53  
54  
55  
56  
57

1  
2  
3 experienced abnormalities or a diagnosis of HPV previously and so had been monitored more  
4 closely than every two years under the old program.  
5  
6

7  
8 >Table 2 here<  
9

10 Three main themes emerged from the data: knowledge and attitudes about the changes,  
11 information dissemination, and focus on meaning of results and the new test.  
12  
13

### 14 **1) Knowledge and attitudes about changes**

15  
16 Despite being screened under the renewed program, some women demonstrated a lack of  
17 awareness of the changes to the cervical screening program [Q1; Table 3]. Women who were  
18 knowledgeable about the changes tended to have sought further information and done their own  
19 research [Q2].  
20  
21  
22  
23  
24  
25

26  
27 >Table 3 here<  
28

29 Those who were aware regarded the main change to be the extended screening interval, from  
30 two year to five years, with a few women understanding that this was due to the change in  
31 screening technology [Q3]. Some women understood that what is being tested for has changed,  
32 with the effectiveness of screening for HPV rather than abnormal cells, noting this was earlier  
33 detection [Q4]. Overall women noted that the testing procedure was identical to the Pap smear  
34 [Q5].  
35  
36  
37  
38  
39  
40  
41

42 A concern expressed about the extended screening interval was that cancer might develop and  
43 be missed in between screens, particularly prominent in women with personal experience of  
44 abnormalities [Q6]. A few HPV- women described the need to take responsibility for their own  
45 health due to the increased screening interval, which included getting any symptoms which  
46 were 'unusual' checked out at the doctor. However, women also expressed positive attitudes  
47 including experiencing less anxiety, stress and discomfort due to screening less often. Those  
48 women with positive views tended to contextualise these in terms of the new testing technology  
49  
50  
51  
52  
53  
54  
55  
56  
57



1  
2  
3 being more sensitive and more accurate [Q7] and this woman explained how she thought the  
4 testing process was much easier if you test HPV+ than previously with the Pap smear due to  
5 the ability to test the same sample [Q8].  
6  
7  
8

9  
10 One woman alluded to the potential for overtreatment if screening with this new testing  
11 technology continued on a two-yearly basis, due to the high incidence of HPV and subsequent  
12 referrals for colposcopy [Q9].  
13  
14

15  
16 Some women also related the program changes back to the HPV vaccination, recognising that  
17 uptake of the HPV vaccination should impact rates of HPV and therefore cervical cancer. This  
18 helped them make sense of the program changes and believed it could also help increase  
19 uptake of the HPV vaccination [Q10].  
20  
21  
22

23  
24 For most women, they envisaged that the NCSP changes would have minimal impact on their  
25 screening behaviour. The only tangible impact the NCSP changes would have on their  
26 screening behaviour would be having to screen less often.  
27  
28  
29  
30

## 31 32 **2) Information dissemination**

### 33 34 2.1 Changes to the program

35  
36 The amount of information women described being given about the changes to the cervical  
37 screening program when they attended for screening varied, with women mostly being told  
38 about it being a new test and that the screening interval would now be every five years. Some  
39 women were made aware of the changes through discussions with their GP/other health  
40 professionals; usually these discussions took place in the consultation, when they attended for  
41 screening. Most women said that the explanation was brief, but were asked if they had any  
42 questions about the changes [Q11]. A few women who attended for their Pap smear prior to  
43 December 2017, had been advised by their GP to postpone their screen to December 2017, as  
44 then they would then enter into the new program [Q12].  
45  
46  
47  
48  
49  
50  
51  
52  
53  
54  
55  
56  
57  
58  
59  
60

1  
2  
3 While some women were happy with the amount of information they received and had good  
4 experiences [Q13], others described less positive experiences with health professionals when it  
5 came to cervical screening, with one woman explaining that she had to go back multiple times  
6 as the doctor did not believe she needed to be screened [Q14].  
7  
8  
9

10  
11  
12 Very few women reported being provided with written information by their GP or other health  
13 professional. In terms of preferences for information about the changes to the cervical screening  
14 program, women talked about the need for advertisement on television and in the media to  
15 reach a lot of women to encourage them to go for screening, with radio and internet  
16 advertisements more likely to reach younger women [Q15].  
17  
18  
19  
20  
21  
22

23 Women felt information resources such as a pamphlet containing information about HPV and  
24 how common it is, would be useful to refer to as well as communicating it as being 'normal'.  
25 Additionally, information on self-care in terms of what to do if something is wrong or what  
26 potential symptoms could be, was also perceived as important. Being signposted to a website  
27 with information about the changes to the screening program and the meaning of results, was  
28 also suggested.  
29  
30  
31  
32  
33  
34  
35  
36

## 37 2.2 New results

38  
39 When asked if there was anything that would have helped to better understand screening under  
40 the revised program, most women suggested a "staggering of information" over time, where  
41 they would receive information about the changes/possible results prior to screening and then  
42 again when receiving the results. Women who tested HPV+ in particular wanted to know about  
43 the possible results/referral information prior to screening; women who tested HPV- were more  
44 indifferent about receiving information about possible results prior to screening. Information  
45 about what the results meant was the main focus of seeking information for these women.  
46  
47  
48  
49  
50  
51  
52  
53  
54  
55  
56  
57  
58  
59  
60

1  
2  
3 Women acknowledged that too much information can be overwhelming and lead to increased  
4 anxiety. Women felt information could accompany the invitation letter or be displayed in waiting  
5 rooms, with the combination of a brochure and conversation with a health professional being  
6 optimal [Q16].  
7  
8  
9  
10

11 The key time points identified for information delivery were: i) prior to screening, when invited; ii)  
12 during screening; iii) when receiving screening results. Information formats suggested by  
13 women included information pamphlets in GP offices, web-links to reputable online sources; and  
14 posters in shopping centres/public toilets.  
15  
16  
17  
18  
19  
20

### 21 **3) Meaning of test results and emotional responses to the new test**

22

23 Women received their screening results in various ways including by letter, over the phone,  
24 face-to-face during a GP appointment, or not hearing anything and assuming everything was ok  
25 [Q17]. A few women described their anxiety in the time between the test and the results, with  
26 one woman expressing this was the first time she'd had the test and so didn't know what to  
27 expect [Q18].  
28  
29  
30  
31  
32  
33

34 Overall women were able to recall their HPV results (positive or negative) and understand the  
35 implications these HPV results have for returning for screening in the future. Even among the  
36 women who did not know their results, they knew when they were due to have screening again.  
37 However, these women did not demonstrate knowledge about the nature of HPV, its  
38 transmission, and the implications of testing positive (or negative) for HPV and the associated  
39 risk of progression to cervical cancer. Some women who were HPV+ did express knowledge  
40 that their HPV result did not mean that cancer is inevitable and that these abnormal cells can  
41 resolve by themselves without the need for treatment [Q19].  
42  
43  
44  
45  
46  
47  
48  
49  
50

51 Higher risk women who had previously had an abnormal Pap smear result and/or already knew  
52 their HPV+ status (especially types 16/18) due to persistent infection, were less alarmed about  
53  
54  
55  
56  
57

1  
2  
3 receiving an HPV+ result. Similarly, women who had previously had a normal Pap smear result  
4 and received an HPV- result were also not alarmed by this new type of result. However, women  
5 who had previously had normal Pap smear results were somewhat anxious if they received  
6 HPV+ results [Q20]. One woman who tested HPV- but had a previous abnormality would have  
7 liked to be tested more frequently [Q21]. Those women who received an HPV+ result would  
8 have liked their GP/other health professional to have explained the possible results of this test  
9 prior to screening, as a means of preparing them [Q22].  
10  
11

12  
13  
14 One of the HPV+ women described how initially she was worried about waiting 12 months after  
15 being told she screened positive for HPV, but a better understanding reduced her worry [Q23].  
16  
17 Some women told to rescreen in five years were happy to follow the guidelines and  
18 recommendations, whereas others, particularly those with a history of abnormal results, were  
19 wanting further reassurance and said they would rescreen more frequently [Q24].  
20  
21

22  
23  
24 One older woman, who was not aware of the high prevalence of HPV, alluded to the stigma  
25 associated with an HPV+ result, however there were few instances of women expressing  
26 feelings of stigma about being HPV+ [Q25]. Women showed more limited understanding of  
27 accompanying cytology changes; especially amongst women with normal cytology and low-  
28 grade abnormalities. Women with high-grade abnormalities had better understanding, mainly  
29 because they had a persistent form of HPV and had previously returned abnormal results and/or  
30 had also been referred to a gynaecologist for a subsequent colposcopy. Only a couple of  
31 women recalled their level of risk (e.g. intermediate risk) for cervical cancer.  
32  
33

34  
35  
36 Women who were HPV+ talked about their understanding and experiences of the new testing  
37 pathway, with one woman describing how the doctor explained it to her using the flowcharts  
38 [Q26].  
39  
40

41  
42  
43 There were some women who felt that healthcare professionals had not adequately explained  
44 their results to them. Some women felt the information was not made relevant to them or was  
45  
46

1  
2  
3 too clinical, and that they wanted to be given more detail with their results. These women  
4  
5 conducted their own research online to find out more about HPV and what their results meant  
6  
7 [Q27].  
8  
9

## 10 **DISCUSSION**

11  
12 The study findings contribute to our understanding of women's experiences of the deintensified  
13  
14 cervical screening program in Australia and provide us with insight into how women have  
15  
16 interpreted communication of their test results. Overall, women showed limited knowledge of the  
17  
18 changes to the NCSP, but demonstrated understanding about what the results meant for them  
19  
20 and their future screening. There was high variability in how the results were communicated to  
21  
22 women by their GP/other health professional. Some women reported positive experiences of  
23  
24 communication which provided reassurance and aided good understanding of the changes and  
25  
26 implications of results, while others reported poor communication of results by their GP/other  
27  
28 health professional and felt they had to independently search for further information. The impact  
29  
30 of HPV+ results appeared greater in women who had previously had normal Pap smear results.  
31  
32 Encouragingly, women envisaged that the changes to the NCSP would have minimal impact on  
33  
34 their own screening behaviour. A few women were concerned about changes to the program  
35  
36 leading to missing cancers and getting lost in the system if they moved interstate. These  
37  
38 findings mirror those from previous research.<sup>7,21</sup>  
39  
40  
41  
42

43 Women in this sample were mainly positive about the changes to the program, reflected in  
44  
45 comments about the new cervical screening test and perceived the test to be more accurate  
46  
47 and effective than the Pap smear. This perhaps reflects a trust in decision-makers, that despite  
48  
49 some negative press surrounding the changes, women in this sample trusted that the changes  
50  
51 had been made for the better and this was reinforced for some when they were advised by their  
52  
53 GP to wait for the new program to be implemented.  
54  
55  
56  
57  
58  
59  
60

1  
2  
3 It was evident that women still lacked knowledge about HPV and its transmission, particularly in  
4 women who were HPV-, and so there is still a great need for community education surrounding  
5 cervical screening and HPV. Linking the HPV vaccination to the changes made to the screening  
6 program, gave women a tangible way in which to understand reasons for the five-year interval  
7 being safe. This could be a good strategy to target both mothers and their daughters to educate  
8 them about the importance of cervical screening and how advances in technology has enabled  
9 us to now screen primarily for the HPV infection.  
10  
11

12  
13 Although this sample of women mainly reported being told in their GP consultation when they  
14 attended for screening about the changes in the test and the screening interval, most indicated  
15 that they would have liked to have received some written information and also seen some public  
16 advertisements about the program changes, supporting our previous findings.<sup>22</sup> Women also  
17 wanted written information about the test results and expressed importance that this is  
18 consistent across the program. In addition, how women receive their results should also be  
19 standardised, as women in this sample described multiple ways of receiving their results (e.g.  
20 phone, person, letter). Some women in this sample reported that they did not know or  
21 remember their test results. Our own survey data has shown anxiety and distress were higher in  
22 women who did not know their results compared to those who were HPV-.<sup>13</sup> The  
23 recommendations provided by the women in this sample for information delivery to be staged  
24 across the screening journey, from prior to screening to receiving the results, are important to  
25 consider when implementing a new screening test to help women's understanding of both the  
26 reasons for the new test and what the results of the new test mean for them. Women have been  
27 shown to prefer active or shared decision making approaches regarding the follow-up of  
28 abnormal test results,<sup>23</sup> so it is important women understand what these results mean for them.  
29  
30 Encouragingly, women reported that their doctors communicated with them about the new test  
31 and what this now checks for, with women showing an understanding behind the reason for the  
32  
33  
34  
35  
36  
37  
38  
39  
40  
41  
42  
43  
44  
45  
46  
47  
48  
49  
50  
51  
52  
53  
54  
55  
56  
57  
58  
59  
60

1  
2  
3 change in test. This is important as our previous research showed that communicating to  
4 women about the change in test can then help provide reassurance and understanding to  
5 women about some of the other changes to the program.<sup>22</sup>  
6  
7  
8

9  
10 The psychosocial impact of screening and test results was evident across the sample,  
11 particularly with women screened HPV+. When worry and anxiety were expressed by these  
12 women, this was mostly related to testing, results and the extended screening interval. A focus  
13 needs to be given to information provision for those women who are HPV+ and who have not  
14 experienced abnormal results in the past. It is important that they receive the information they  
15 need to alleviate anxiety as these women demonstrated greater anxiety than women who were  
16 HPV+ with experience of previous abnormalities. Women with previous abnormalities were less  
17 alarmed by their results due to their previous experience and having a greater knowledge of the  
18 system, but those who screen HPV- who have a history of previous abnormalities may prefer to  
19 be screened more frequently.  
20  
21  
22  
23  
24  
25  
26  
27  
28  
29  
30

31 Encouragingly, there was a good understanding among women who were HPV+ that cancer  
32 was not inevitable and that some cell changes might resolve without the need for treatment,  
33 demonstrating good communication from health professionals. This is particularly encouraging  
34 given around 8% of women (n=195,606) tested HPV+ in the first 6 months of the renewed  
35 program.<sup>24</sup> Of important note is that this, combined with healthcare providers not adhering to the  
36 guidelines, has consequently resulted in the increase in number of colposcopy referrals being  
37 much greater than expected.<sup>25</sup> This holds implications for an increased number of women  
38 referred for colposcopy and experiencing long wait times, as awaiting to undergo colposcopy  
39 has been shown to increase anxiety levels.<sup>26</sup>  
40  
41  
42  
43  
44  
45  
46  
47  
48  
49  
50

51 Clear messages to women about the reasons for a change in test, as well as information which  
52 normalises HPV and explains what their test results mean for them, are important to  
53 communicate and provide reassurance. These messages could be in the form of written or  
54  
55  
56  
57

1  
2  
3 verbal communication, with the need for women testing HPV+ for the first time to receive  
4 individualised messages which acknowledge their previous normal test results.  
5  
6

7  
8 To the best of our knowledge, this is the first study exploring the experiences of women  
9 receiving different results after receiving primary HPV screening as part of the National Cervical  
10 Screening Program. The qualitative design enabled us to explore in depth experiences of  
11 women residing in Australia who reported cervical screening since implementation of the  
12 renewed NCSP, and their understanding of the results from the new cervical screening test.  
13  
14 These findings provide insight into how much information women perceived they received about  
15 the new program and how they understood their test results. Due to the qualitative nature of the  
16 study, this aim was not to produce findings which are generalisable across the whole  
17 population, but to provide some insight across a purposively collected sample of women who  
18 received a range of test results from the renewed cervical screening program. Most women in  
19 the sample were regular screeners and so may not reflect the experiences of women who were  
20 previous non-attenders or irregular screeners in the old NCSP and have now had screening  
21 under the renewed NCSP. The sample was restricted to women who could speak English.  
22  
23  
24  
25  
26  
27  
28  
29  
30  
31  
32  
33  
34  
35

### 36 **Conclusions**

37  
38 Despite women demonstrating an understanding about the new cervical screening test, more  
39 written information and public communication about the changes and possible results are  
40 warranted. In particular, efforts are needed to ensure women who are HPV+ with no history of  
41 abnormal results receive the information they need to alleviate anxiety. Tailored information  
42 could take into consideration women's previous cervical screening results and risk for a  
43 significant cervical abnormality.  
44  
45  
46  
47  
48  
49  
50

51  
52 **Ethics approval and consent to participate:** This study was approved by The University of  
53 Sydney Human Ethics Committee (2018/836).  
54  
55  
56  
57



**Data availability:** The datasets generated and/or analysed during the study are available from the corresponding author on reasonable request.

**Funding:** This work was supported by a National Health and Medical Research Council Program Grant (APP1113532).

**Patient consent for publication:** Not required.

**Disclosure of interests:** None declared

**Author Statement: Rachael Dodd:** Conceptualization, Data curation, Formal analysis, Investigation, Methodology, Project administration, Writing – Original draft preparation **Olivia Mac:** Formal analysis, Writing – Reviewing and Editing; **Kirsten McCaffery:** Conceptualization, Methodology, Funding acquisition, Formal analysis, Validation, writing – review and editing. All authors contributed to the interpretation of the analysis and critically revised the manuscript.

**Acknowledgements:** We thank Dynata for recruitment services, Alana Fisher for her input and support with data collection, and all study participants. We thank the Wiser Healthcare patient partner committee for comments on the design and findings of this research during presentations of the work at Wiser Healthcare National meetings.

## REFERENCES

1. Machalek, D. A. *et al.* Very Low Prevalence of Vaccine Human Papillomavirus Types among 18- to 35-Year Old Australian Women 9 Years Following Implementation of Vaccination. *J. Infect. Dis.* **217**, 1590–1600 (2018).
2. Australian Institute of Health and Welfare. *Cervical screening in Australia 2019.* (2019).
3. American Cancer Society. The American Cancer Society Guidelines for the Prevention and Early Detection of Cervical Cancer. (2018). Available at: <https://www.cancer.org/cancer/cervical-cancer/prevention-and-early-detection/cervical->

- cancer-screening-guidelines.html. (Accessed: 20th June 2019)
4. Polman, N. J., Snijders, P. J. F., Kenter, G. G., Berkhof, J. & Meijer, C. J. L. M. HPV-based cervical screening: Rationale, expectations and future perspectives of the new Dutch screening programme. *Prev. Med. (Baltim)*. **119**, 108–117 (2019).
  5. McBride, E. *et al.* Anxiety and distress following receipt of results from routine HPV primary testing in cervical screening: the Psychological Impact of Primary Screening (PIPS) study. *Int. J. Cancer* **June**, (2019).
  6. Medical Services Advisory Committee. *National Cervical Screening Program Renewal: Evidence Review (Assessment Report)*. MSAC Application No. 1276. (2013).
  7. Obermair, H., Dodd, R., Jansen, J., Bonner, C. & McCaffery, K. J. “It has saved thousands of lives, so why change it?” Content analysis of objections to cervical screening programme changes in Australia. *BMJ Open* **8**, e019171 (2018).
  8. Canfell, K., Hammond, I., Saville, M. & Cancer Council Australia Cervical Cancer Screening Guidelines Working Party. National Cervical Screening Program: Guidelines for the management of screen-detected abnormalities, screening in specific populations and investigation of abnormal vaginal bleed. (2018). Available at: <https://wiki.cancer.org.au/australiawiki/index.php?oldid=190197>, cited 2019 Mar 26]. (Accessed: 27th March 2019)
  9. Anderson, L., Saville, M. & Wright, G. Cancer Council Australia Cervical Cancer Screening Guidelines Working Party. (2018). Available at: [https://wiki.cancer.org.au/australia/Guidelines:Cervical\\_cancer/Screening/Sample\\_cervical\\_screening\\_reports](https://wiki.cancer.org.au/australia/Guidelines:Cervical_cancer/Screening/Sample_cervical_screening_reports).
  10. McCaffery, K. *et al.* Testing positive for human papillomavirus in routine cervical screening: examination of psychosocial impact. *BJOG* **111**, 1437–43 (2004).

- 1  
2  
3 11. McCaffery, K., Waller, J., Nazroo, J. & Wardle, J. Social and psychological impact of HPV  
4 testing in cervical screening: a qualitative study. *Sex. Transm. Infect.* **82**, 169–74 (2006).  
5  
6
- 7  
8 12. McCaffery, K. *et al.* Attitudes towards HPV testing: A qualitative study of beliefs among  
9 Indian, Pakistani, African-Caribbean and white British women in the UK. *Br. J. Cancer* **88**,  
10 42–46 (2003).  
11  
12
- 13  
14 13. Dodd, R. H., Mac, O., Brotherton, J. M. L., Cvejic, E. & McCaffery, K. J. Levels of anxiety  
15 and distress following receipt of positive screening tests in Australia's HPV-based cervical  
16 screening programme: a cross-sectional survey. *Sex. Transm. Infect.* 1–7 (2020).  
17  
18  
19 doi:10.1136/sextrans-2019-054290  
20  
21
- 22  
23 14. McBride, E. *et al.* Psychological Impact of Primary Screening ( PIPS ) for HPV : a protocol  
24 for a cross-sectional evaluation within the NHS cervical screening programme. *BMJ Open*  
25  
26 **6**, e014356 (2016).  
27  
28
- 29  
30 15. Guest, G., Bunce, A. & Johnson, L. How many interviews are enough? An experiment  
31 with data saturation and variability. *Field methods* **18**, 59–82 (2006).  
32  
33  
34
- 35 16. Jayasinghe, Y. *et al.* Primary HPV DNA based cervical cancer screening at 25 years:  
36 Views of young Australian women aged 16-28 years. *J. Clin. Virol.* **76**, S74–S80 (2016).  
37  
38
- 39  
40 17. Scalzo, K. & Mullins, R. The recommended interval for cervical cancer screening:  
41 Victorian women's attitudes to an extended interval. *Aust. N. Z. J. Public Health* **39**, 153–  
42 156 (2015).  
43  
44
- 45  
46 18. Ogilvie, G. S. *et al.* Correlates of women's intentions to be screened for human  
47 papillomavirus for cervical cancer screening with an extended interval. *BMC Public*  
48  
49 *Health* **16**, 213 (2016).  
50  
51
- 52  
53 19. Ogilvie, G. S. *et al.* Women's intentions to receive cervical cancer screening with primary  
54 human papillomavirus testing. *Int. J. Cancer* **133**, 2934–2943 (2013).  
55  
56  
57

- 1  
2  
3 20. QSR. *NVivo qualitative data analysis Software Version 11*. (QSR International Pty Ltd.,  
4 2015).  
5  
6  
7  
8 21. Dodd, R. H., Obermair, H. M. & McCaffery, K. J. A thematic analysis of attitudes toward  
9 changes to cervical screening in Australia. *JMIR Cancer* **5**, 1–9 (2019).  
10  
11  
12 22. Dodd, R. *et al*. Examining the information needed for acceptance of de-intensified  
13 screening programs: qualitative focus groups about cervical screening in Australia. *BMJ*  
14 *Open* **9**, e029319 (2019).  
15  
16  
17  
18 23. Dieng, M., Trevena, L., Turner, R., Wadolowski, M. & McCaffery, K. What Australian  
19 women want and when they want it: cervical screening testing preferences, decision-  
20 making styles and information needs. *Heal. Expect.* **16**, 177–88 (2013).  
21  
22  
23  
24  
25  
26 24. Machalek, D. A. *et al*. Routine cervical screening by primary HPV testing: early findings in  
27 the renewed National Cervical Screening Program. *Med. J. Aust.* mja2.50223 (2019).  
28 doi:10.5694/mja2.50223  
29  
30  
31  
32  
33 25. Smith, M., Hammond, I. & Saville, M. Lessons from the renewal of the National Cervical  
34 Screening Program in Australia. *Public Heal. Res. Pract.* **29**, 1–6 (2019).  
35  
36  
37  
38 26. Rogstad, K. E. The psychological impact of abnormal cytology and colposcopy. *BJOG An*  
39 *Int. J. Obstet. Gynaecol.* **109**, 364–368 (2002).  
40  
41  
42  
43  
44  
45  
46  
47  
48  
49  
50  
51  
52  
53  
54  
55  
56  
57  
58  
59  
60

1  
2  
3  
4  
5  
6  
7  
8  
9  
10  
11  
12  
13  
14  
15  
16  
17  
18  
19  
20  
21  
22  
23  
24  
25  
26  
27  
28  
29  
30  
31  
32  
33  
34  
35  
36  
37  
38  
39  
40  
41  
42  
43  
44  
45  
46  
47  
48  
49  
50  
51  
52  
53  
54  
55  
56  
57  
58  
59  
60

**Figure 1: Australian National Cervical Screening Program results pathway**

For peer review only

**Table 1: Sampling frame**

|                                                    | Education     |                       | Age |       |       |     | HPV vaccine |    |
|----------------------------------------------------|---------------|-----------------------|-----|-------|-------|-----|-------------|----|
|                                                    | No University | University or Diploma | <35 | 36-50 | 51-65 | 66+ | Yes         | No |
| <b>Cervical Screening</b>                          |               |                       |     |       |       |     |             |    |
| <b>Test Result</b>                                 |               |                       |     |       |       |     |             |    |
| <b>HPV positive (n=15)</b>                         |               |                       |     |       |       |     |             |    |
| 16/18 (HPV+ 16/18)                                 | 2             | 2                     | 2   | 2     | 0     | 0   | 1           | 3  |
| Other (HPV+ other risk)                            | 0             | 6                     | 1   | 3     | 1     | 1   | 2           | 4  |
| Type unknown (HPV+ type unknown)                   | 2             | 3                     | 1   | 1     | 2     | 1   | 2           | 3  |
| <b>HPV negative (n=8)</b>                          | 2             | 6                     | 3   | 1     | 3     | 1   | 2           | 6  |
| <b>HPV status unknown: Don't know/unsure (n=3)</b> | 2             | 1                     | 2   | 0     | 1     | 0   | 2           | 1  |

NB: numbers total n under each test result across the columns of education, age and HPV vaccine.

**Table 2: Sample characteristics**

|                                              | n (%)     |
|----------------------------------------------|-----------|
| <b>HPV status</b>                            |           |
| HPV+ 16/18                                   | 4 (15.4)  |
| HPV+ other risk                              | 6 (23.1)  |
| HPV+ type unknown                            | 5 (19.2)  |
| HPV negative                                 | 8 (30.8)  |
| HPV status unknown: Don't know/unsure result | 3 (11.5)  |
| <b>Age</b>                                   |           |
| <35                                          | 9 (34.6)  |
| 36-50                                        | 7 (26.9)  |
| 51-65                                        | 7 (26.9)  |
| 66+                                          | 3 (11.5)  |
| <b>Education</b>                             |           |
| No university                                | 18 (69.2) |
| University                                   | 8 (30.8)  |
| <b>Employment</b>                            |           |
| Full-time                                    | 8 (30.8)  |
| Part-time                                    | 7 (26.9)  |
| Retired/studying/other                       | 11 (42.3) |
| <b>Born in Australia</b>                     |           |
| Yes                                          | 22 (84.6) |
| No                                           | 4 (15.4)  |
| <b>Marital status</b>                        |           |
| Single/dating                                | 5 (19.2)  |
| Married/living with partner                  | 13 (50.0) |
| Partnered/not living with partner            | 1 (3.8)   |
| Separated or divorced                        | 6 (23.1)  |
| Widowed                                      | 1 (3.8)   |
| <b>HPV vaccination</b>                       |           |
| Yes                                          | 9 (34.6)  |
| No/don't know                                | 17 (65.3) |

**Table 3: Quotes from interviews to support the themes**

| Code                                         | Quote                                                                                                                                                                                                                                                                                                                                                                                                                                                                                                            | Page |
|----------------------------------------------|------------------------------------------------------------------------------------------------------------------------------------------------------------------------------------------------------------------------------------------------------------------------------------------------------------------------------------------------------------------------------------------------------------------------------------------------------------------------------------------------------------------|------|
| <b>Knowledge and attitudes about changes</b> |                                                                                                                                                                                                                                                                                                                                                                                                                                                                                                                  |      |
| Q1                                           | <i>I did see I think a couple of little pop up things about it and I know that a couple of girls in my social circle have mentioned that the new test was available and it was a five year screening, but I haven't seen any other information about what difference it will make. (HPV-, &lt;35 years old, unvaccinated, University degree)</i>                                                                                                                                                                 | 9    |
| Q2                                           | <i>I spent a couple of hours actually looking into everything I could find. Just even about HPV itself because I didn't understand any of it.<br/>It was really useful ... but I had to actually go looking for it. It wasn't something that was put out there ... If it had been out there it may have been discussed and I might have known a bit more ... It would've been good to have been publicly informed in some ways. (HPV+ (type unknown), 36-50 years old, unvaccinated, Diploma or certificate)</i> | 9    |
| Q3                                           | <i>Well I know that the main change is you only have to go every five years and not every two years because they've developed a different way to look at the cells or something (HPV+ (not 16/18), &lt;35 years old, vaccinated, Diploma or certificate)</i>                                                                                                                                                                                                                                                     | 9    |
| Q4                                           | <i>From what I understand, the technology is drastically improved which means obviously its better technology and they trust the technology better. I think the fact they're tracking the virus that causes the cancer is really good. (HPV-, 36-50 years old, unvaccinated, Diploma or certificate)</i>                                                                                                                                                                                                         | 9    |
| Q5                                           | <i>I think in all honestly my experience is it's the same ... I can't say I've noticed any change to be honest. (HPV+ 16/18 &amp; CIN1, 36-50 years old, unvaccinated, Trade apprenticeship)</i>                                                                                                                                                                                                                                                                                                                 | 9    |
| Q6                                           | <i>My instant reaction is horror because that's a long time without a Pap smear because you don't know what your body is doing. In there if you've got cancer somewhere in that area, it's got five years to spread. (HPV+ (type unknown), 66+ years old, unvaccinated, School certificate)</i>                                                                                                                                                                                                                  | 9    |
| Q7                                           | <i>Well the fact that if it's done every five as opposed to two then obviously having to go for less testing, is less anxiety and less stress so on that basis that's good ... If I have to only do it once every five years it's very positive in my view. I think it will encourage more people to do it because it's not something that you have to do that often. (HPV+ (not 16/18), 36-50 years old, unvaccinated, University degree)</i>                                                                   | 10   |
| Q8                                           | <i>What's easier now is I don't have to come back for another test and wait for a result then be told now you have to go to a specialist. The fact I knew immediately that's what the next step was really good. That was really positive. (HPV+ (type unknown), 36-50 years old, unvaccinated, Diploma or certificate)</i>                                                                                                                                                                                      | 10   |
| Q9                                           | <i>I do have concerns as to whether the HPV is over testing, are you finding things that are not meant to be there - is it over diagnosis as well which leads to unnecessary treatments, unnecessary follow ups and referrals. That did</i>                                                                                                                                                                                                                                                                      | 10   |



|                                                                        |                                                                                                                                                                                                                                                                                                                                                                                                                                                                                |    |
|------------------------------------------------------------------------|--------------------------------------------------------------------------------------------------------------------------------------------------------------------------------------------------------------------------------------------------------------------------------------------------------------------------------------------------------------------------------------------------------------------------------------------------------------------------------|----|
|                                                                        | <i>cross my mind. (HPV+ (not 16/18), 36-50 years old, unvaccinated, University degree)</i>                                                                                                                                                                                                                                                                                                                                                                                     |    |
| Q10                                                                    | <i>Because you're immunising your girls against the HPV they will be less likely to get cervical cancer, which is why they only have to be screened five yearly. (HPV-, 36-50 years old, unvaccinated, Diploma or certificate)</i>                                                                                                                                                                                                                                             | 10 |
| <b>Information Dissemination</b>                                       |                                                                                                                                                                                                                                                                                                                                                                                                                                                                                |    |
| Q11                                                                    | <i>Just about the difference now that they're testing for the virus that causes the cell changes rather than testing for cell changes, you can catch things earlier and prevent them. (HPV+ (16/18), 36-50 years old, unvaccinated, School certificate)</i>                                                                                                                                                                                                                    | 10 |
| Q12                                                                    | <i>I was due to have one, I don't know what month it was, last year and she said wait till December because then they've got a new test. I didn't really worry about it - I mean I haven't had any negative [sic] results (i.e. abnormal) so she just said in December they're doing it a different way so do you want to wait till December. (HPV-, 51-65 years old, unvaccinated, School certificate)</i>                                                                    | 10 |
| Q13                                                                    | <i>She explained the process and how the test works and exactly what she does and how they get the samples and how it's tested. I was quite happy with the extent of the information that she provided. It coincided with my understanding of the test and what the results would show or not. (HPV-, &lt;35 years old, vaccinated, Higher School Certificate)</i>                                                                                                             | 11 |
| Q14                                                                    | <i>I didn't end up getting it that day. Then ... sent out a request to my old postal address, saying that I was on a high priority list to get it done. They called me up and apologised about it ... The Doctor ... she didn't really believe me again so she called up [Path lab] and asked them if I really needed to be there and they said yes, she's on the priority listing or urgent listing. (HPV+ 16/18, &lt;35 years old, unvaccinated, Diploma or certificate)</i> | 11 |
| Q15                                                                    | <i>I think there needs to be an ad done about it because it's prevalent it's there every day it's something women have to have done. It's an element that goes around and I think the public need to be more informed. TV ads, radio ads I think, internet ads because younger generation take much more notice of them. (HPV+ (type unknown), 36-50 years old, unvaccinated, Diploma or certificate)</i>                                                                      | 11 |
| Q16                                                                    | <i>Maybe it could be a brochure and a conversation from your GP or kind of the Doctor/gynaecologist whoever you're communicating with so that they can ask questions and then you have some information to go back and read if you want to. I don't know then I suppose on the brochure if there is a phone number for people to call if they have further questions. (HPV+ not 16/18 &amp; negative cytology, 36-50 years old, unvaccinated, University degree)</i>           | 12 |
| <b>Meaning of test results and emotional responses to the new test</b> |                                                                                                                                                                                                                                                                                                                                                                                                                                                                                |    |
| Q17                                                                    | <i>Results, no. They only really call you in for results if something is wrong and they need to discuss it otherwise you don't sort of hear from them. I would've liked just an acknowledgement to say that everything is fine instead of just assuming. Even if it was only a short email or something. (HPV status unknown, 51-65 years old, unvaccinated, no school or other qualifications)</i>                                                                            | 12 |

|     |                                                                                                                                                                                                                                                                                                                                                                                                                                                                                                |    |
|-----|------------------------------------------------------------------------------------------------------------------------------------------------------------------------------------------------------------------------------------------------------------------------------------------------------------------------------------------------------------------------------------------------------------------------------------------------------------------------------------------------|----|
| Q18 | <i>Oh, I was a little bit nervous. I didn't think that I was a high candidate to have issues. Still it's the first time I've done the test I could've had a dormant virus or something for a few years and not known about it. It was just generally, because I've never done it, I'm uncertain it might have been an underlying problem I had never known about but it wasn't so that was good. (HPV-, &lt;35 years old, vaccinated, Higher School Certificate)</i>                           | 12 |
| Q19 | <i>It didn't mean that I would get cancer but I would have a more increased risk and now I would have to have yearly Pap smears and they will be tested the old way to detect changes in my cells because we know I've already got the HPV virus. (HPV+ 16/18 &amp; negative cytology, 36-50 years old, unvaccinated, School certificate)</i>                                                                                                                                                  | 12 |
| Q20 | <i>I'm glad nothing is wrong but it's a little daunting knowing I'm in that increased risk group ... Like I said to my husband it's more when I have my Pap smear every year now rather than not thinking about it because it's been normal for so long, now that I've got the virus I think I will be a little bit more anxious till I get the result now. (HPV+ 16/18 &amp; negative cytology, 36-50 years old, unvaccinated, school certificate)</i>                                        | 13 |
| Q21 | <i>Well I would believe that it would mean I wouldn't need to go back for five years however given that I've had abnormal test results in the past I think I will probably still get one done two years after that test just to make sure and if that's clear then I would be reassured I could then go to five yearly screening ... I think I will take myself to another test. (HPV-, &lt;35 years old, unvaccinated, University degree)</i>                                                 | 13 |
| Q22 | <i>Probably explaining more about it, how you can get it. I think already having the pamphlet what it can turn into, cervical cancer and things like that. While you're having the Pap smear I think so too and also if you have to go to get a procedure like a biopsy or whatever just to explain it again. (HPV+ 16/18 &amp; CIN1, 36-50 years old, unvaccinated, Trade apprenticeship)</i>                                                                                                 | 13 |
| Q23 | <i>Yeah, I will be making it [appointment] for when the 12 months is up for sure. Now I have a better understanding I'm okay with it and going back in 12 months it's fine. Hopefully it will be gone and if it's not go back in another 12 months or whatever the threshold is. My initial reaction was I have to wait 12 months, I'm going to have to worry about this for 12 months but now I'm okay about it. (HPV+ (not 16/18), &lt;35 years old, vaccinated, Diploma or certificate)</i> | 13 |
| Q24 | <i>Well I would believe that it would mean I wouldn't need to go back for five years however given that I've had abnormal test results in the past I think I will probably still get one done two years after that test just to make sure and if that's clear then I would be reassured I could then go to five yearly screening. (HPV-, &lt;35 years old, unvaccinated, University degree)</i>                                                                                                | 13 |
| Q25 | <i>I hadn't had sex for years ... the diagnosis I got from the Pap smear [is] normally [for] people [who] are sexually active. I thought it was some kind of an STI and then when I thought about it I thought I hadn't been with anyone for years, how did I get this unless it's been in the body for years and shown up now. (HPV+ (type unknown), 66+ years old, unvaccinated, School certificate)</i>                                                                                     | 13 |

|                                 |     |                                                                                                                                                                                                                                                                                                                          |    |
|---------------------------------|-----|--------------------------------------------------------------------------------------------------------------------------------------------------------------------------------------------------------------------------------------------------------------------------------------------------------------------------|----|
| 1<br>2<br>3<br>4<br>5<br>6<br>7 | Q26 | <i>That's how it was explained and then when he was going through the flow charts and stuff about when you get this and then we have to do this next treatment. (HPV+ (not 16/18) &amp; negative cytology, 36-50 years old, University degree)</i>                                                                       | 13 |
| 8<br>9<br>10<br>11<br>12<br>13  | Q27 | <i>She just pretty much said how most people do have the virus; she wasn't particularly good at explaining it. It was just lucky that I've already been to so many Doctors who are better at explaining it so I've got a general understanding. (HPV+ 16/18, &lt;35 years old, unvaccinated, Diploma or certificate)</i> | 14 |

14  
15  
16  
17  
18  
19  
20  
21  
22  
23  
24  
25  
26  
27  
28  
29  
30  
31  
32  
33  
34  
35  
36  
37  
38  
39  
40  
41  
42  
43  
44  
45  
46  
47  
48  
49  
50  
51  
52  
53  
54  
55  
56  
57  
58  
59  
60

For peer review only

**Figure 1: Australian National Cervical Screening Program results pathway**

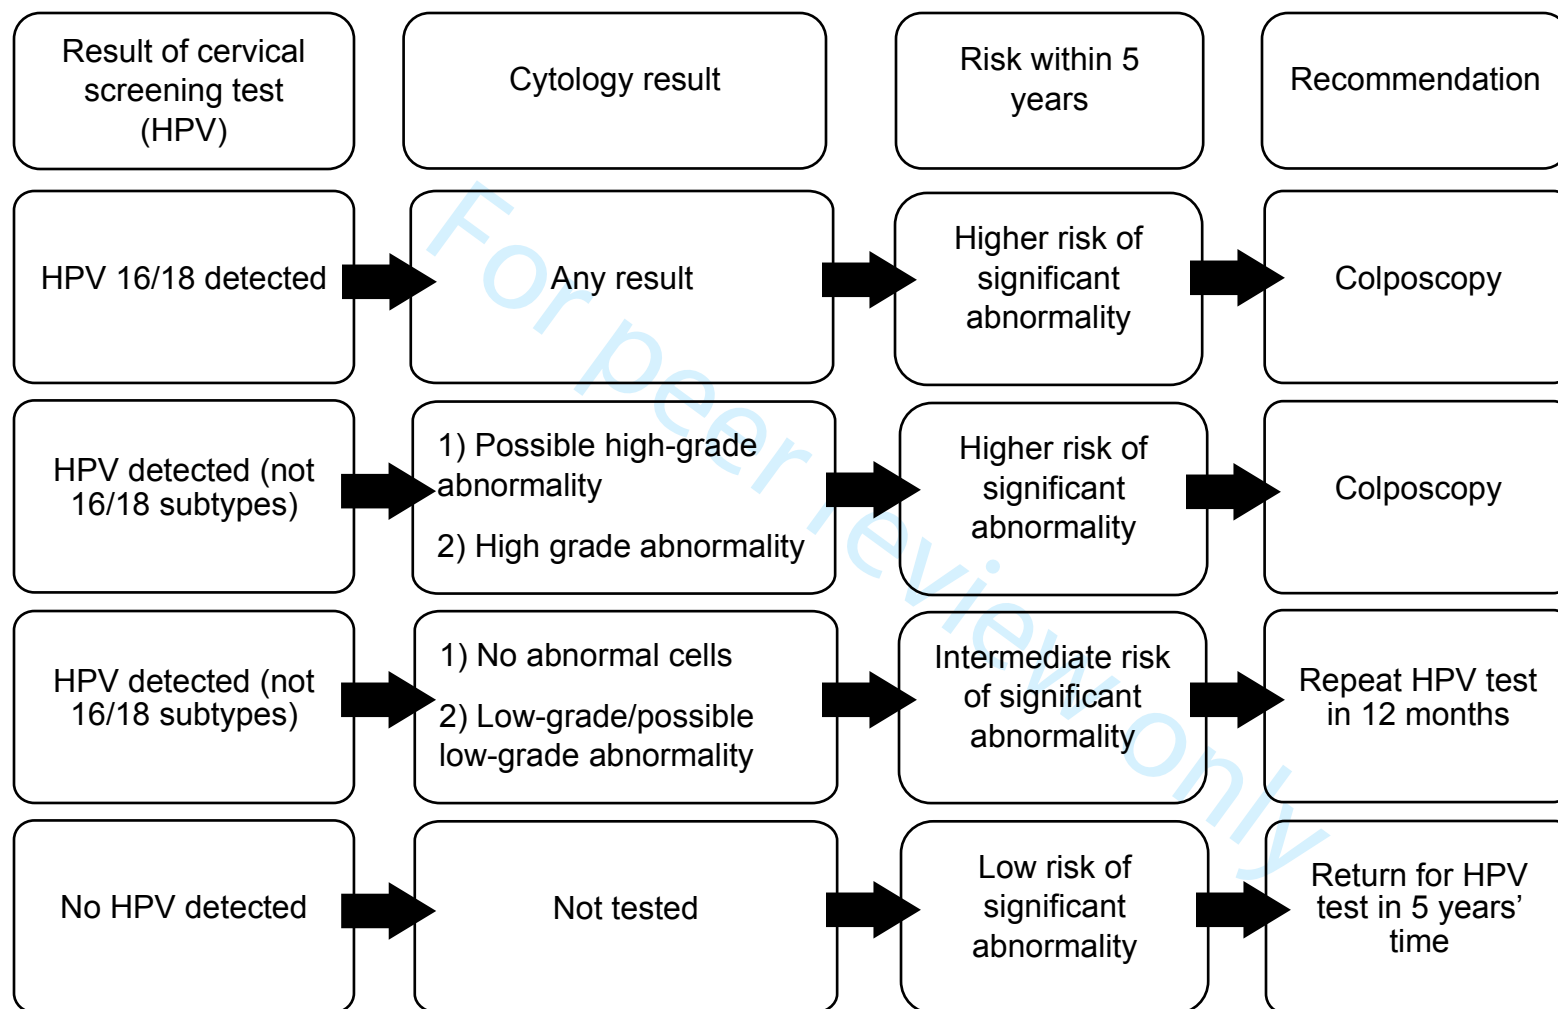

**Supplementary Information: Interview topic guide**

1. Knowledge of renewed cervical screening program
2. Last attendance for cervical screen (how came about attending, what happened, results, implications of results)
3. Exploring what/if told about results and how
4. Understanding of results and what they mean
5. Thoughts/feelings on results, any impact of results
6. Awareness of changes before December 2017 (what/how heard; thoughts on/expectations about the changes)
7. Experience of cervical screening since renewed program
8. General thoughts/feelings on the changes to the cervical screening program
9. Whether doctor shared thoughts on the changes
10. Anything made it difficult to participate in screening since renewal (challenges/barriers)
11. Anything made it easier to participate in screening since renewal (enablers/facilitators) that may be different to you attending previously for cervical screening?
12. Changes (positive/negative) made or experienced seeing doctor for cervical screening/other health issues
13. Changes (positive/negative) towards seeing doctor for cervical screening/other health issues in the future
14. Explore information given from doctor about the changes
15. Explore educational materials or other resources helped better understand
16. Recommendations for educational materials or other resources for women eligible for screening (content/format/delivery)
17. Any other comments about renewed cervical screening program/anything else

# Reporting checklist for qualitative study.

Based on the SRQR guidelines.

## Instructions to authors

Complete this checklist by entering the page numbers from your manuscript where readers will find each of the items listed below.

Your article may not currently address all the items on the checklist. Please modify your text to include the missing information. If you are certain that an item does not apply, please write "n/a" and provide a short explanation.

Upload your completed checklist as an extra file when you submit to a journal.

In your methods section, say that you used the SRQR reporting guidelines, and cite them as:

O'Brien BC, Harris IB, Beckman TJ, Reed DA, Cook DA. Standards for reporting qualitative research: a synthesis of recommendations. Acad Med. 2014;89(9):1245-1251.

|              |                                                                                                                                                                                                                                                                | Page   |
|--------------|----------------------------------------------------------------------------------------------------------------------------------------------------------------------------------------------------------------------------------------------------------------|--------|
|              | Reporting Item                                                                                                                                                                                                                                                 | Number |
| <b>Title</b> | <p><a href="#">#1</a> Concise description of the nature and topic of the study identifying the study as qualitative or indicating the approach (e.g. ethnography, grounded theory) or data collection methods (e.g. interview, focus group) is recommended</p> | 1      |

## Abstract

[#2](#) Summary of the key elements of the study using the abstract format of the intended publication; typically includes background, purpose, methods, results and conclusions

## Introduction

[#3](#) Description and significance of the problem / phenomenon studied: review of relevant theory and empirical work; problem statement

[#4](#) Purpose of the study and specific objectives or question

## Methods

[#5](#) Qualitative approach and research paradigm

Qualitative approach (e.g. ethnography, grounded theory, case study, phenomenology, narrative research) and guiding theory if appropriate; identifying the research paradigm (e.g. postpositivist, constructivist / interpretivist) is also recommended; rationale. The rationale should briefly discuss the justification for choosing that theory, approach, method or technique rather than other options available; the assumptions and limitations implicit in those choices and how those choices influence study conclusions and transferability.

As appropriate the rationale for several items might be discussed together.

|    |                           |                     |    |
|----|---------------------------|---------------------|----|
| 1  |                           |                     |    |
| 2  |                           |                     |    |
| 3  |                           |                     |    |
| 4  |                           |                     |    |
| 5  |                           |                     |    |
| 6  | Researcher                | <a href="#">#6</a>  | 8  |
| 7  |                           |                     |    |
| 8  | characteristics and       |                     |    |
| 9  |                           |                     |    |
| 10 | reflexivity               |                     |    |
| 11 |                           |                     |    |
| 12 |                           |                     |    |
| 13 |                           |                     |    |
| 14 |                           |                     |    |
| 15 |                           |                     |    |
| 16 |                           |                     |    |
| 17 |                           |                     |    |
| 18 |                           |                     |    |
| 19 |                           |                     |    |
| 20 |                           |                     |    |
| 21 |                           |                     |    |
| 22 | Context                   | <a href="#">#7</a>  | 6  |
| 23 |                           |                     |    |
| 24 |                           |                     |    |
| 25 | Sampling strategy         | <a href="#">#8</a>  | 7  |
| 26 |                           |                     |    |
| 27 |                           |                     |    |
| 28 |                           |                     |    |
| 29 |                           |                     |    |
| 30 |                           |                     |    |
| 31 |                           |                     |    |
| 32 |                           |                     |    |
| 33 |                           |                     |    |
| 34 |                           |                     |    |
| 35 | Ethical issues pertaining | <a href="#">#9</a>  | 16 |
| 36 |                           |                     |    |
| 37 | to human subjects         |                     |    |
| 38 |                           |                     |    |
| 39 |                           |                     |    |
| 40 |                           |                     |    |
| 41 |                           |                     |    |
| 42 |                           |                     |    |
| 43 |                           |                     |    |
| 44 |                           |                     |    |
| 45 | Data collection methods   | <a href="#">#10</a> | 7  |
| 46 |                           |                     |    |
| 47 |                           |                     |    |
| 48 |                           |                     |    |
| 49 |                           |                     |    |
| 50 |                           |                     |    |
| 51 |                           |                     |    |
| 52 |                           |                     |    |
| 53 |                           |                     |    |
| 54 |                           |                     |    |
| 55 |                           |                     |    |
| 56 |                           |                     |    |
| 57 |                           |                     |    |
| 58 |                           |                     |    |
| 59 |                           |                     |    |
| 60 |                           |                     |    |



|    |                         |                     |                                                          |     |
|----|-------------------------|---------------------|----------------------------------------------------------|-----|
| 1  | Data collection         | <a href="#">#11</a> | Description of instruments (e.g. interview guides,       | 7   |
| 2  |                         |                     | questionnaires) and devices (e.g. audio recorders)       |     |
| 3  | instruments and         |                     | used for data collection; if / how the instruments(s)    |     |
| 4  |                         |                     | changed over the course of the study                     |     |
| 5  | technologies            |                     |                                                          |     |
| 6  |                         |                     |                                                          |     |
| 7  |                         |                     |                                                          |     |
| 8  |                         |                     |                                                          |     |
| 9  |                         |                     |                                                          |     |
| 10 |                         |                     |                                                          |     |
| 11 | Units of study          | <a href="#">#12</a> | Number and relevant characteristics of participants,     | 8   |
| 12 |                         |                     | documents, or events included in the study; level of     |     |
| 13 |                         |                     | participation (could be reported in results)             |     |
| 14 |                         |                     |                                                          |     |
| 15 |                         |                     |                                                          |     |
| 16 |                         |                     |                                                          |     |
| 17 |                         |                     |                                                          |     |
| 18 |                         |                     |                                                          |     |
| 19 | Data processing         | <a href="#">#13</a> | Methods for processing data prior to and during          | 7   |
| 20 |                         |                     | analysis, including transcription, data entry, data      |     |
| 21 |                         |                     | management and security, verification of data integrity, |     |
| 22 |                         |                     | data coding, and anonymisation / deidentification of     |     |
| 23 |                         |                     | excerpts                                                 |     |
| 24 |                         |                     |                                                          |     |
| 25 |                         |                     |                                                          |     |
| 26 |                         |                     |                                                          |     |
| 27 |                         |                     |                                                          |     |
| 28 |                         |                     |                                                          |     |
| 29 |                         |                     |                                                          |     |
| 30 |                         |                     |                                                          |     |
| 31 | Data analysis           | <a href="#">#14</a> | Process by which inferences, themes, etc. were           | 7/8 |
| 32 |                         |                     | identified and developed, including the researchers      |     |
| 33 |                         |                     | involved in data analysis; usually references a specific |     |
| 34 |                         |                     | paradigm or approach; rationale                          |     |
| 35 |                         |                     |                                                          |     |
| 36 |                         |                     |                                                          |     |
| 37 |                         |                     |                                                          |     |
| 38 |                         |                     |                                                          |     |
| 39 |                         |                     |                                                          |     |
| 40 |                         |                     |                                                          |     |
| 41 | Techniques to enhance   | <a href="#">#15</a> | Techniques to enhance trustworthiness and credibility    | 7/8 |
| 42 |                         |                     | of data analysis (e.g. member checking, audit trail,     |     |
| 43 | trustworthiness         |                     | triangulation); rationale                                |     |
| 44 |                         |                     |                                                          |     |
| 45 |                         |                     |                                                          |     |
| 46 |                         |                     |                                                          |     |
| 47 |                         |                     |                                                          |     |
| 48 | <b>Results/findings</b> |                     |                                                          |     |
| 49 |                         |                     |                                                          |     |
| 50 |                         |                     |                                                          |     |
| 51 | Syntheses and           | <a href="#">#16</a> | Main findings (e.g. interpretations, inferences, and     | 8   |
| 52 |                         |                     | themes); might include development of a theory or        |     |
| 53 | interpretation          |                     | model, or integration with prior research or theory      |     |
| 54 |                         |                     |                                                          |     |
| 55 |                         |                     |                                                          |     |
| 56 |                         |                     |                                                          |     |
| 57 |                         |                     |                                                          |     |
| 58 |                         |                     |                                                          |     |
| 59 |                         |                     |                                                          |     |
| 60 |                         |                     |                                                          |     |

1 Links to empirical data [#17](#) Evidence (e.g. quotes, field notes, text excerpts, Table 3  
2  
3 photographs) to substantiate analytic findings  
4  
5

## 6 Discussion

7  
8  
9  
10 Intergration with prior [#18](#) Short summary of main findings; explanation of how 13  
11 work, implications, findings and conclusions connect to, support, elaborate  
12 transferability and on, or challenge conclusions of earlier scholarship;  
13 contribution(s) to the field discussion of scope of application / generalizability;  
14 identification of unique contributions(s) to scholarship  
15  
16  
17  
18  
19  
20  
21 in a discipline or field  
22  
23

24 Limitations [#19](#) Trustworthiness and limitations of findings 4  
25  
26

## 27 Other

28  
29  
30 Conflicts of interest [#20](#) Potential sources of influence of perceived influence on 16  
31 study conduct and conclusions; how these were  
32 managed  
33  
34  
35  
36  
37

38 Funding [#21](#) Sources of funding and other support; role of funders in 16  
39 data collection, interpretation and reporting  
40  
41  
42

43 None The SRQR checklist is distributed with permission of Wolters Kluwer © 2014 by the Association  
44 of American Medical Colleges. This checklist can be completed online using  
45  
46  
47 <https://www.goodreports.org/>, a tool made by the [EQUATOR Network](#) in collaboration with  
48  
49  
50 [Penelope.ai](#)  
51  
52  
53  
54  
55  
56  
57  
58  
59  
60
