# Supplementary material for: Women’s experiences of the renewed National Cervical Screening Program in Australia 12 months following implementation: a qualitative study
Source: PubMed Central journal article supplement — BMJ Open. 2020 Jul 13;10(7):e039041. doi: 10.1136/bmjopen-2020-039041 (PMC7359067; doi:10.1136/bmjopen-2020-039041), 2020-07-13
Supplement: bmjopen-2020-039041supp001.pdf [file bmjopen-2020-039041supp001.pdf]

**Supplementary Information: Interview topic guide**

1. Knowledge of renewed cervical screening program
2. Last attendance for cervical screen (how came about attending, what happened, results, implications of results)
3. Exploring what/if told about results and how
4. Understanding of results and what they mean
5. Thoughts/feelings on results, any impact of results
6. Awareness of changes before December 2017 (what/how heard; thoughts on/expectations about the changes)
7. Experience of cervical screening since renewed program
8. General thoughts/feelings on the changes to the cervical screening program
9. Whether doctor shared thoughts on the changes
10. Anything made it difficult to participate in screening since renewal (challenges/barriers)
11. Anything made it easier to participate in screening since renewal (enablers/facilitators) that may be different to you attending previously for cervical screening?
12. Changes (positive/negative) made or experienced seeing doctor for cervical screening/other health issues
13. Changes (positive/negative) towards seeing doctor for cervical screening/other health issues in the future
14. Explore information given from doctor about the changes
15. Explore educational materials or other resources helped better understand
16. Recommendations for educational materials or other resources for women eligible for screening (content/format/delivery)
17. Any other comments about renewed cervical screening program/anything else
